# Supplementary material for: Dynamic transcription factor activity networks in response to independently altered mechanical and adhesive microenvironmental cues
Source: Royal Society of Chemistry journal article supplement (doi:10.1039/c6ib00093b), 2016-01-01
Supplement: c6ib00093b3.xlsx [file c6ib00093b3.xlsx]

## Sheet: FileS6. SignificantEdgesforRGD_
				ADHESION												STIFFNESS
					PROBABILITY					P-VALUES							PROBABILITY					P-VALUES
					Time Intervals (hr)					Time Intervals (hr)							Time Intervals (hr)					Time Intervals (hr)
From TFr	Interaction	To TFr		Linear Edge	0 to 3	3 to 6	6 to 9	9 to 12	12 to 27	0 to 3	3 to 6	6 to 9	9 to 12	12 to 27		Linear Edge	0 to 3	3 to 6	6 to 9	9 to 12	12 to 27	0 to 3	3 to 6	6 to 9	9 to 12	12 to 27
AP1	-1	MEF1		Linear	0.658017	0.0861909	0.626506	0.701576	0.494903	0	0.95765	0.95765	0.95765	0		Linear	0	0	0	0	0	1	1	1	1	1
AP1	-1	PR		Linear	0	0	0	0	0	1	1	1	1	1		Linear	0.0684346	0.0504705	0.0307956	0.0958084	0.660393	0	0.973398	0.77535	0.101204	0
AP1	-1	SP1		Linear	0.681186	0.591288	0.546803	0.515292	0.609824	0.95765	0.0287356	0	0	0		Linear	0	0	0	0	0	1	1	1	1	1
AP2	-1	AP4		Linear	0.0509731	0.0806302	0.0583874	0.690454	0.648749	0.0663717	0.95765	0.95765	0.95765	0		Linear	0	0	0	0	0	1	1	1	1	1
AP4	-1	GATA6		Linear	0.764597	0.0435589	0.0444856	0.0352178	0.00648749	0	0.95765	0.95765	0.95765	0.95765		Linear	0	0	0	0	0	1	1	1	1	1
AP4	-1	PR		Linear	0	0	0	0	0	1	1	1	1	1		Linear	0.236955	0.488452	0.480753	0.112062	0.637297	0	0.973398	0.973398	0.0934853	0
AP4	1	HSF		Linear	0	0	0	0	0	1	1	1	1	1		Linear	0.0735672	0.626176	0.476476	0.364414	0.589393	0	0.973398	0	0	0.973398
AR	-1	CRE		Linear	0.02595	0.590361	0.584801	0.535681	0.0982391	0.235294	0.95765	0.95765	0	0.95765		Linear	0	0	0	0	0	1	1	1	1	1
AR	-1	MEF2		Linear	0.478221	0.492122	0.267841	0.310473	0.676552	0	0.95765	0.95765	0.95765	0		Linear	0	0	0	0	0	1	1	1	1	1
AR	-1	SRE		Linear	0.755329	0.651529	0.636701	0.444856	0.0278035	0	0.95765	0	0.95765	0.95765		Linear	0	0	0	0	0	1	1	1	1	1
AR	-1	STAT4		Linear	0.16126	0.577386	0.0973123	0.341057	0.564411	0	0.95765	0.424528	0.95765	0.95765		Linear	0	0	0	0	0	1	1	1	1	1
AR	1	E2F1		Linear	0.745134	0.533828	0.0583874	0.0426321	0.081557	0	0.95765	0.95765	0.95765	0.95765		Linear	0	0	0	0	0	1	1	1	1	1
CMYC	-1	SRF		Linear	0	0	0	0	0	1	1	1	1	1		Linear	0.127459	0.0581694	0.451668	0.486741	0.132592	0	0.973398	0.973398	0.973398	0.973398
CRE	1	AP1		Linear	0.73772	0.0500463	0.0379981	0.0166821	0.0546803	0	0.95765	0.95765	0.95765	0.95765		Linear	0	0	0	0	0	1	1	1	1	1
ETS1	-1	CRE		Linear	0.0157553	0.52734	0.0370714	0.535681	0.720111	0.95765	0.95765	0.95765	0	0.95765		Linear	0	0	0	0	0	1	1	1	1	1
ETS1	-1	KLF4		Linear	0.0203892	0.0240964	0.470806	0.532901	0.656163	0.458716	0.95765	0	0	0		Linear	0	0	0	0	0	1	1	1	1	1
ETS1	-1	RXR		Linear	0.752549	0.113994	0.060241	0.068582	0.00648749	0	0.95765	0.95765	0.95765	0.95765		Linear	0	0	0	0	0	1	1	1	1	1
ETS1	1	GAS/ISRE		Linear	0.0435589	0.0287303	0.0250232	0.243744	0.70899	0.95765	0.95765	0.95765	0	0		Linear	0	0	0	0	0	1	1	1	1	1
GAS	-1	GR		Linear	0	0	0	0	0	1	1	1	1	1		Linear	0.0470488	0.0479042	0.0710009	0.365269	0.0538922	0	0.973398	0.973398	0	0.271453
GAS	-1	SRF		Linear	0	0	0	0	0	1	1	1	1	1		Linear	0.0470488	0.677502	0.457656	0.306245	0.101796	0.808752	0.973398	0	0.973398	0.973398
GAS	1	SRF		Linear	0	0	0	0	0	1	1	1	1	1		Linear	0.402053	0.00513259	0.0128315	0.00769889	0.106074	0	0.973398	0.973398	0.973398	0.048926
GATA6	-1	MEF1		Linear	0.0639481	0.0389249	0.00370714	0.625579	0.0398517	0.049505	0.95765	0.95765	0	0.95765		Linear	0	0	0	0	0	1	1	1	1	1
GATA6	-1	STAT3		Linear	0.260426	0.670065	0.375348	0.491196	0.522706	0	0.95765	0.95765	0.95765	0		Linear	0	0	0	0	0	1	1	1	1	1
GATA6	1	CRE		Linear	0.390176	0.0481928	0.012975	0.02595	0.662651	0	0.95765	0.95765	0.95765	0.95765		Linear	0	0	0	0	0	1	1	1	1	1
GATA6	1	PTTG		Linear	0.0148285	0.246525	0.111214	0.493049	0.551437	0.628319	0.229358	0.95765	0	0.95765		Linear	0	0	0	0	0	1	1	1	1	1
GATA6	1	RXR		Linear	0.708063	0.544022	0.0278035	0.021316	0.0861909	0	0.0287356	0.95765	0.95765	0.380577		Linear	0	0	0	0	0	1	1	1	1	1
GL1	1	RXR		Linear	0.0417053	0.0991659	0.055607	0.0528267	0.765524	0.083682	0.900439	0.95765	0.95765	0		Linear	0	0	0	0	0	1	1	1	1	1
GR	-1	GAS		Linear	0	0	0	0	0	1	1	1	1	1		Linear	0.390077	0.0992301	0.0025663	0.0102652	0.00855432	0	0.973398	0.973398	0.973398	0.973398
GR	-1	STAT1		Linear	0.686747	0.0324374	0.0315107	0.0139018	0.0370714	0	0.95765	0.95765	0.95765	0.95765		Linear	0	0	0	0	0	1	1	1	1	1
GR	1	AP4		Linear	0	0	0	0	0	1	1	1	1	1		Linear	0.311377	0.0727117	0.498717	0.0598802	0.0453379	0	0.973398	0.973398	0.223318	0.973398
GR	1	GAS		Linear	0	0	0	0	0	1	1	1	1	1		Linear	0.0290847	0.0889649	0.432849	0.359281	0.349016	0.0552121	0.608781	0	0.973398	0
GR	1	MEF1		Linear	0.510658	0.478221	0.606117	0.0379981	0.0954588	0	0.95765	0.95765	0.95765	0.273775		Linear	0	0	0	0	0	1	1	1	1	1
HSE	1	ETS1		Linear	0.0157553	0.459685	0.732159	0.409639	0.0973123	0.594796	0.049505	0	0	0.95765		Linear	0	0	0	0	0	1	1	1	1	1
HSF	-1	SMAD3/4		Linear	0	0	0	0	0	1	1	1	1	1		Linear	0.398631	0.0521814	0.0581694	0.0530368	0.106074	0	0.973398	0.973398	0.272464	0.048926
HSF	1	AP4		Linear	0	0	0	0	0	1	1	1	1	1		Linear	0.125749	0.786997	0.568862	0.351583	0.52438	0	0.973398	0	0	0
IRF1	-1	STAT1		Linear	0.0315107	0.521779	0.463392	0.422614	0.646895	0.174825	0.95765	0.95765	0.95765	0		Linear	0	0	0	0	0	1	1	1	1	1
MEF1	1	GATA6		Linear	0.629286	0.746061	0.891566	0.772011	0.012975	0	0.95765	0	0	0.95765		Linear	0	0	0	0	0	1	1	1	1	1
MEF2	-1	FOXO3A		Linear	0.00648749	0.367006	0.652456	0.0250232	0.0222428	0.95765	0.95765	0	0.95765	0.95765		Linear	0	0	0	0	0	1	1	1	1	1
MEF2	1	AR		Linear	0.0194625	0.060241	0.563485	0.0324374	0.0787766	0.466667	0.95765	0	0.95765	0.95765		Linear	0	0	0	0	0	1	1	1	1	1
MYB1	1	HSF		Linear	0.0111214	0.448563	0.549583	0.124189	0.15848	0.894428	0.049505	0	0.95765	0.083682		Linear	0	0	0	0	0	1	1	1	1	1
NFKB	1	STAT4		Linear	0	0	0	0	0	1	1	1	1	1		Linear	0.025663	0.0624465	0.47562	0.0564585	0.144568	0.0552121	0.973398	0	0.251243	0.0196204
NOTCH1	-1	MEF2		Linear	0.102873	0.0620945	0.021316	0.0268767	0.714551	0	0.95765	0.95765	0.95765	0		Linear	0	0	0	0	0	1	1	1	1	1
NOTCH1	-1	P53		Linear	0	0	0	0	0	1	1	1	1	1		Linear	0.0102652	0.00769889	0.00342173	0.0581694	0.590248	0.808752	0.973398	0.973398	0.230672	0
P53	-1	PTTG		Linear	0	0	0	0	0	1	1	1	1	1		Linear	0.0889649	0.731394	0.423439	0.0975192	0.577417	0	0.973398	0.973398	0.101204	0
PEA3	-1	AP1		Linear	0	0	0	0	0	1	1	1	1	1		Linear	0.0581694	0.0410607	0.0675791	0.394354	0.558597	0	0.973398	0.973398	0	0.973398
PEA3	-1	FOXO3A		Linear	0.0101946	0.0139018	0.00648749	0.677479	0.424467	0.95765	0.95765	0.95765	0.95765	0		Linear	0	0	0	0	0	1	1	1	1	1
PR	-1	SP1		Linear	0	0	0	0	0	1	1	1	1	1		Linear	0.0598802	0.610778	0.571429	0.0444825	0.588537	0	0.973398	0	0.421875	0
PTTG	1	SMAD3/4		Linear	0	0	0	0	0	1	1	1	1	1		Linear	0.0521814	0.495295	0.473054	0.329341	0.141146	0	0.0371081	0	0	0.0196204
RGD	-1	AP2		Linear	0	0	0	0	0	1	1	1	1	1		Linear	0	0	0	0	0	1	1	1	1	1
RGD	-1	AP4		Linear	0.73494	0.000926784	0	0	0	0	0.95765	0.95765	0.95765	0.95765		Linear	0	0	0	0	0	1	1	1	1	1
RGD	-1	CRE		Non-linear	0.206673	0	0	0	0	0	0.95765	0.95765	0.95765	0.95765		Linear	0	0	0	0	0	1	1	1	1	1
RGD	-1	ETS1		Linear	0	0	0	0	0	1	1	1	1	1		Linear	0	0	0	0	0	1	1	1	1	1
RGD	-1	GR		Linear	0	0	0	0	0	1	1	1	1	1		Linear	0	0	0	0	0	1	1	1	1	1
RGD	-1	IRF1		Linear	0	0	0	0	0	1	1	1	1	1		Linear	0	0	0	0	0	1	1	1	1	1
RGD	-1	MEF1		Linear	0	0	0	0	0	1	1	1	1	1		Linear	0	0	0	0	0	1	1	1	1	1
RGD	-1	YY1		Linear	0	0	0	0	0	1	1	1	1	1		Linear	0	0	0	0	0	1	1	1	1	1
RGD	1	AR		Linear	0.750695	0.00278035	0	0	0	0	0.95765	0.95765	0.95765	0.95765		Linear	0	0	0	0	0	1	1	1	1	1
RGD	1	GL1		Non-linear	0	0	0	0	0	1	1	1	1	1		Linear	0	0	0	0	0	1	1	1	1	1
RGD	1	MEF2		Linear	0	0	0	0	0	1	1	1	1	1		Linear	0	0	0	0	0	1	1	1	1	1
RGD	1	MYB1		Linear	0	0	0	0	0	1	1	1	1	1		Linear	0	0	0	0	0	1	1	1	1	1
RGD	1	NOTCH1		Non-linear	0	0	0	0	0	1	1	1	1	1		Linear	0	0	0	0	0	1	1	1	1	1
RGD	1	PEA3		Non-linear	0	0	0	0	0	1	1	1	1	1		Linear	0	0	0	0	0	1	1	1	1	1
RGD	1	VDR		Non-linear	0	0	0	0	0	1	1	1	1	1		Linear	0	0	0	0	0	1	1	1	1	1
RXR	-1	HSE		Linear	0.611677	0.729379	0.476367	0.00278035	0.112141	0	0	0	0.95765	0.216049		Linear	0	0	0	0	0	1	1	1	1	1
SMAD3/4	-1	SP1		Linear	0	0	0	0	0	1	1	1	1	1		Linear	0.0393499	0.568862	0.54491	0.401198	0.558597	0.0196204	0.0371081	0	0	0
SP1	1	AR		Linear	0	0	0	0	0	1	1	1	1	1		Linear	0.42515	0.675791	0.302823	0.144568	0.578272	0	0.973398	0.973398	0.973398	0
SP1	1	E2F1		Linear	0.13531	0.0500463	0.0444856	0.445783	0.76367	0	0.95765	0.95765	0.95765	0.95765		Linear	0	0	0	0	0	1	1	1	1	1
SP1	1	GR		Linear	0	0	0	0	0	1	1	1	1	1		Linear	0.373824	0.100941	0.0701454	0.031651	0.6142	0	0.547107	0.223318	0.675182	0
SP1	1	RAR		Linear	0.435589	0.581094	0.231696	0.143652	0.584801	0	0.95765	0.95765	0.95765	0.95765		Linear	0.183918	0.670659	0.105218	0.0829769	0.320787	0	0.973398	0.127046	0.973398	0.973398
SP1	1	STAT1		Linear	0	0	0	0	0	1	1	1	1	1		Linear	0.0402053	0.094953	0.378101	0.348161	0.0573139	0.0196204	0.973398	0.973398	0	0.973398
SP1	1	YY1		Linear	0	0	0	0	0	1	1	1	1	1		Linear	0.357571	0.528657	0.486741	0.419162	0.715997	0	0.973398	0.973398	0	0.973398
SRE	1	GATA6		Linear	0.699722	0.761816	0.865616	0.0352178	0.012975	0	0.95765	0.95765	0.95765	0.95765		Linear	0	0	0	0	0	1	1	1	1	1
SRF	1	ELK1		Linear	0	0	0	0	0	1	1	1	1	1		Linear	0.094953	0.0846878	0.0863986	0.331908	0.142857	0	0.973398	0.973398	0	0.973398
STAT3	1	AP1		Linear	0.0379981	0.68582	0.696015	0.684893	0.769231	0.95765	0.95765	0	0.95765	0.95765		Linear	0	0	0	0	0	1	1	1	1	1
STIFFNESS	-1	AP4		Linear	0	0	0	0	0	1	1	1	1	1		Linear	0.334474	0.00427716	0	0	0	0	0.973398	0.973398	0.973398	0.973398
STIFFNESS	-1	HSF		Linear	0	0	0	0	0	1	1	1	1	1		Linear	0.183918	0.00427716	0	0	0	0	0.973398	0.973398	0.973398	0.973398
STIFFNESS	-1	NOTCH1		Linear	0	0	0	0	0	1	1	1	1	1		Linear	0	0	0	0	0	1	1	1	1	1
STIFFNESS	-1	P53		Linear	0	0	0	0	0	1	1	1	1	1		Linear	0	0	0	0	0	1	1	1	1	1
STIFFNESS	-1	PEA3		Linear	0	0	0	0	0	1	1	1	1	1		Linear	0	0	0	0	0	1	1	1	1	1
STIFFNESS	-1	TCF/LEF		Linear	0	0	0	0	0	1	1	1	1	1		Linear	0	0	0	0	0	1	1	1	1	1
STIFFNESS	1	CMYC		Non-linear	0	0	0	0	0	1	1	1	1	1		Non-linear	0	0	0	0	0	1	1	1	1	1
STIFFNESS	1	GATA		Linear	0	0	0	0	0	1	1	1	1	1		Linear	0.667237	0.378956	0.00427716	0.000855432	0.00171086	0	0.0934853	0.973398	0.973398	0.973398
STIFFNESS	1	NFKB		Linear	0	0	0	0	0	1	1	1	1	1		Linear	0	0	0	0	0	1	1	1	1	1
STIFFNESS	1	PR		Linear	0	0	0	0	0	1	1	1	1	1		Linear	0.151411	0.00342173	0	0	0	0	0.973398	0.973398	0.973398	0.973398
STIFFNESS	1	SP1		Linear	0	0	0	0	0	1	1	1	1	1		Linear	0.434559	0.0025663	0	0	0	0	0.973398	0.973398	0.973398	0.973398
TCF/LEF	1	AP1		Linear	0	0	0	0	0	1	1	1	1	1		Linear	0.0282293	0.0367836	0.102652	0.0453379	0.595381	0.0552121	0.973398	0.973398	0.973398	0
VDR	1	AP1		Linear	0.590361	0.047266	0.0398517	0.02595	0.7924	0	0.95765	0.95765	0.95765	0.95765		Linear	0	0	0	0	0	1	1	1	1	1
YY1	-1	STAT4		Linear	0	0	0	0	0	1	1	1	1	1		Linear	0.0761334	0.586826	0.390932	0.0213858	0.0744226	0.808752	0.0196204	0	0.808752	0.134508
YY1	1	AR		Linear	0.687674	0.0658017	0.0296571	0.0203892	0.0769231	0	0.95765	0.95765	0.95765	0.95765		Linear	0	0	0	0	0	1	1	1	1	1
YY1	1	GR		Linear	0	0	0	0	0	1	1	1	1	1		Linear	0.139435	0.565441	0.467066	0.0299401	0.104363	0	0.973398	0	0.717021	0.973398
