# Supplementary material for: Dynamic transcription factor activity networks in response to independently altered mechanical and adhesive microenvironmental cues
Source: Royal Society of Chemistry journal article supplement (doi:10.1039/c6ib00093b), 2016-01-01
Supplement: c6ib00093b4.xlsx [file c6ib00093b4.xlsx]

## Sheet: FileS3.TFreportersSpecificityFI
TF Reporter	Start	Stop	Motif	Motif_Family	p.value_FIMO
AP1	4	12	M0997_0.90$Hoxa3	HOXA3	2.12e-05
AP1	11	19	M0997_0.90$Hoxa3	HOXA3	2.12e-05
AP1	18	26	M0997_0.90$Hoxa3	HOXA3	2.12e-05
AP1	25	33	M0997_0.90$Hoxa3	HOXA3	2.12e-05
AP1	32	40	M0997_0.90$Hoxa3	HOXA3	2.12e-05
AP1	39	47	M0997_0.90$Hoxa3	HOXA3	2.12e-05
AP1	46	54	M0997_0.90$Hoxa3	HOXA3	2.12e-05
AP1	4	12	M0936_0.90$Hoxb4	HOXB4	2.12e-05
AP1	11	19	M0936_0.90$Hoxb4	HOXB4	2.12e-05
AP1	18	26	M0936_0.90$Hoxb4	HOXB4	2.12e-05
AP1	25	33	M0936_0.90$Hoxb4	HOXB4	2.12e-05
AP1	32	40	M0936_0.90$Hoxb4	HOXB4	2.12e-05
AP1	39	47	M0936_0.90$Hoxb4	HOXB4	2.12e-05
AP1	46	54	M0936_0.90$Hoxb4	HOXB4	2.12e-05
AP1	4	12	M0842_0.90$Evx1	EVX1	2.61e-05
AP1	11	19	M0842_0.90$Evx1	EVX1	2.61e-05
AP1	18	26	M0842_0.90$Evx1	EVX1	2.61e-05
AP1	25	33	M0842_0.90$Evx1	EVX1	2.61e-05
AP1	32	40	M0842_0.90$Evx1	EVX1	2.61e-05
AP1	39	47	M0842_0.90$Evx1	EVX1	2.61e-05
AP1	46	54	M0842_0.90$Evx1	EVX1	2.61e-05
AP1	4	12	M0853_0.90$Hoxa2	HOXA2	2.88e-05
AP1	11	19	M0853_0.90$Hoxa2	HOXA2	2.88e-05
AP1	18	26	M0853_0.90$Hoxa2	HOXA2	2.88e-05
AP1	25	33	M0853_0.90$Hoxa2	HOXA2	2.88e-05
AP1	32	40	M0853_0.90$Hoxa2	HOXA2	2.88e-05
AP1	39	47	M0853_0.90$Hoxa2	HOXA2	2.88e-05
AP1	46	54	M0853_0.90$Hoxa2	HOXA2	2.88e-05
AP1	5	17	V$LHX9_04	LHX9	3.09e-05
AP1	12	24	V$LHX9_04	LHX9	3.09e-05
AP1	19	31	V$LHX9_04	LHX9	3.09e-05
AP1	26	38	V$LHX9_04	LHX9	3.09e-05
AP1	33	45	V$LHX9_04	LHX9	3.09e-05
AP1	40	52	V$LHX9_04	LHX9	3.09e-05
AP1	4	11	M0995_0.90$Hoxd3	HOXD3	3.26e-05
AP1	11	18	M0995_0.90$Hoxd3	HOXD3	3.26e-05
AP1	18	25	M0995_0.90$Hoxd3	HOXD3	3.26e-05
AP1	25	32	M0995_0.90$Hoxd3	HOXD3	3.26e-05
AP1	32	39	M0995_0.90$Hoxd3	HOXD3	3.26e-05
AP1	39	46	M0995_0.90$Hoxd3	HOXD3	3.26e-05
AP1	46	53	M0995_0.90$Hoxd3	HOXD3	3.26e-05
AP1	2	11	V$IPF1_02	IPF1	4.07e-05
AP1	9	18	V$IPF1_02	IPF1	4.07e-05
AP1	16	25	V$IPF1_02	IPF1	4.07e-05
AP1	23	32	V$IPF1_02	IPF1	4.07e-05
AP1	30	39	V$IPF1_02	IPF1	4.07e-05
AP1	37	46	V$IPF1_02	IPF1	4.07e-05
AP1	44	53	V$IPF1_02	IPF1	4.07e-05
AP1	4	12	M0964_0.90$Hoxb3	HOXB3	4.08e-05
AP1	11	19	M0964_0.90$Hoxb3	HOXB3	4.08e-05
AP1	18	26	M0964_0.90$Hoxb3	HOXB3	4.08e-05
AP1	25	33	M0964_0.90$Hoxb3	HOXB3	4.08e-05
AP1	32	40	M0964_0.90$Hoxb3	HOXB3	4.08e-05
AP1	39	47	M0964_0.90$Hoxb3	HOXB3	4.08e-05
AP1	46	54	M0964_0.90$Hoxb3	HOXB3	4.08e-05
AP1	4	11	M0900_0.90$Pdx1	PDX1	4.72e-05
AP1	11	18	M0900_0.90$Pdx1	PDX1	4.72e-05
AP1	18	25	M0900_0.90$Pdx1	PDX1	4.72e-05
AP1	25	32	M0900_0.90$Pdx1	PDX1	4.72e-05
AP1	32	39	M0900_0.90$Pdx1	PDX1	4.72e-05
AP1	39	46	M0900_0.90$Pdx1	PDX1	4.72e-05
AP1	46	53	M0900_0.90$Pdx1	PDX1	4.72e-05
AP1	4	12	M0994_0.90$Hoxc4	HOXC4	4.88e-05
AP1	11	19	M0994_0.90$Hoxc4	HOXC4	4.88e-05
AP1	18	26	M0994_0.90$Hoxc4	HOXC4	4.88e-05
AP1	25	33	M0994_0.90$Hoxc4	HOXC4	4.88e-05
AP1	32	40	M0994_0.90$Hoxc4	HOXC4	4.88e-05
AP1	39	47	M0994_0.90$Hoxc4	HOXC4	4.88e-05
AP1	46	54	M0994_0.90$Hoxc4	HOXC4	4.88e-05
AP1	4	12	M0829_0.90$Hoxa4	HOXA4	5.79e-05
AP1	11	19	M0829_0.90$Hoxa4	HOXA4	5.79e-05
AP1	18	26	M0829_0.90$Hoxa4	HOXA4	5.79e-05
AP1	25	33	M0829_0.90$Hoxa4	HOXA4	5.79e-05
AP1	32	40	M0829_0.90$Hoxa4	HOXA4	5.79e-05
AP1	39	47	M0829_0.90$Hoxa4	HOXA4	5.79e-05
AP1	46	54	M0829_0.90$Hoxa4	HOXA4	5.79e-05
AP1	6	16	M3726_0.90$JUN	JUN	6.49e-05
AP1	13	23	M3726_0.90$JUN	JUN	6.49e-05
AP1	20	30	M3726_0.90$JUN	JUN	6.49e-05
AP1	27	37	M3726_0.90$JUN	JUN	6.49e-05
AP1	34	44	M3726_0.90$JUN	JUN	6.49e-05
AP1	41	51	M3726_0.90$JUN	JUN	6.49e-05
AP1	7	15	V$JDP2_01	JDP2	6.51e-05
AP1	14	22	V$JDP2_01	JDP2	6.51e-05
AP1	21	29	V$JDP2_01	JDP2	6.51e-05
AP1	28	36	V$JDP2_01	JDP2	6.51e-05
AP1	35	43	V$JDP2_01	JDP2	6.51e-05
AP1	42	50	V$JDP2_01	JDP2	6.51e-05
AP1	4	12	M0831_0.90$Meox1	MEOX1	6.54e-05
AP1	11	19	M0831_0.90$Meox1	MEOX1	6.54e-05
AP1	18	26	M0831_0.90$Meox1	MEOX1	6.54e-05
AP1	25	33	M0831_0.90$Meox1	MEOX1	6.54e-05
AP1	32	40	M0831_0.90$Meox1	MEOX1	6.54e-05
AP1	39	47	M0831_0.90$Meox1	MEOX1	6.54e-05
AP1	46	54	M0831_0.90$Meox1	MEOX1	6.54e-05
AP1	6	16	V$NFE2_03	NFE2	6.55e-05
AP1	13	23	V$NFE2_03	NFE2	6.55e-05
AP1	20	30	V$NFE2_03	NFE2	6.55e-05
AP1	27	37	V$NFE2_03	NFE2	6.55e-05
AP1	34	44	V$NFE2_03	NFE2	6.55e-05
AP1	41	51	V$NFE2_03	NFE2	6.55e-05
AP1	4	12	M0845_0.90$Vax1	VAX1	8.11e-05
AP1	11	19	M0845_0.90$Vax1	VAX1	8.11e-05
AP1	18	26	M0845_0.90$Vax1	VAX1	8.11e-05
AP1	25	33	M0845_0.90$Vax1	VAX1	8.11e-05
AP1	32	40	M0845_0.90$Vax1	VAX1	8.11e-05
AP1	39	47	M0845_0.90$Vax1	VAX1	8.11e-05
AP1	46	54	M0845_0.90$Vax1	VAX1	8.11e-05
AP1	3	12	M0816_0.90$EMX1	EMX1	8.16e-05
AP1	10	19	M0816_0.90$EMX1	EMX1	8.16e-05
AP1	17	26	M0816_0.90$EMX1	EMX1	8.16e-05
AP1	24	33	M0816_0.90$EMX1	EMX1	8.16e-05
AP1	31	40	M0816_0.90$EMX1	EMX1	8.16e-05
AP1	38	47	M0816_0.90$EMX1	EMX1	8.16e-05
AP1	45	54	M0816_0.90$EMX1	EMX1	8.16e-05
AP1	4	11	V$VAX2_03	VAX2	8.79e-05
AP1	11	18	V$VAX2_03	VAX2	8.79e-05
AP1	18	25	V$VAX2_03	VAX2	8.79e-05
AP1	25	32	V$VAX2_03	VAX2	8.79e-05
AP1	32	39	V$VAX2_03	VAX2	8.79e-05
AP1	39	46	V$VAX2_03	VAX2	8.79e-05
AP1	46	53	V$VAX2_03	VAX2	8.79e-05
AP1	7	15	M4731_0.90$JDP2	JDP2	9.19e-05
AP1	14	22	M4731_0.90$JDP2	JDP2	9.19e-05
AP1	21	29	M4731_0.90$JDP2	JDP2	9.19e-05
AP1	28	36	M4731_0.90$JDP2	JDP2	9.19e-05
AP1	35	43	M4731_0.90$JDP2	JDP2	9.19e-05
AP1	42	50	M4731_0.90$JDP2	JDP2	9.19e-05
AP1	4	12	M0921_0.90$Vax2	VAX2	9.34e-05
AP1	11	19	M0921_0.90$Vax2	VAX2	9.34e-05
AP1	18	26	M0921_0.90$Vax2	VAX2	9.34e-05
AP1	25	33	M0921_0.90$Vax2	VAX2	9.34e-05
AP1	32	40	M0921_0.90$Vax2	VAX2	9.34e-05
AP1	39	47	M0921_0.90$Vax2	VAX2	9.34e-05
AP1	46	54	M0921_0.90$Vax2	VAX2	9.34e-05
AP1	4	12	M0935_0.90$Hoxa5	HOXA5	0.000101
AP1	11	19	M0935_0.90$Hoxa5	HOXA5	0.000101
AP1	18	26	M0935_0.90$Hoxa5	HOXA5	0.000101
AP1	25	33	M0935_0.90$Hoxa5	HOXA5	0.000101
AP1	32	40	M0935_0.90$Hoxa5	HOXA5	0.000101
AP1	39	47	M0935_0.90$Hoxa5	HOXA5	0.000101
AP1	46	54	M0935_0.90$Hoxa5	HOXA5	0.000101
AP1	4	12	M0952_0.90$Emx2	EMX2	0.000102
AP1	11	19	M0952_0.90$Emx2	EMX2	0.000102
AP1	18	26	M0952_0.90$Emx2	EMX2	0.000102
AP1	25	33	M0952_0.90$Emx2	EMX2	0.000102
AP1	32	40	M0952_0.90$Emx2	EMX2	0.000102
AP1	39	47	M0952_0.90$Emx2	EMX2	0.000102
AP1	46	54	M0952_0.90$Emx2	EMX2	0.000102
AP1	7	15	V$AP1_Q6_01	AP1	0.000116
AP1	14	22	V$AP1_Q6_01	AP1	0.000116
AP1	21	29	V$AP1_Q6_01	AP1	0.000116
AP1	28	36	V$AP1_Q6_01	AP1	0.000116
AP1	35	43	V$AP1_Q6_01	AP1	0.000116
AP1	42	50	V$AP1_Q6_01	AP1	0.000116
AP1	2	11	V$IPF1_01	IPF1	0.000119
AP1	9	18	V$IPF1_01	IPF1	0.000119
AP1	16	25	V$IPF1_01	IPF1	0.000119
AP1	23	32	V$IPF1_01	IPF1	0.000119
AP1	30	39	V$IPF1_01	IPF1	0.000119
AP1	37	46	V$IPF1_01	IPF1	0.000119
AP1	44	53	V$IPF1_01	IPF1	0.000119
AP1	4	12	M0937_0.90$Hoxb5	HOXB5	0.000131
AP1	11	19	M0937_0.90$Hoxb5	HOXB5	0.000131
AP1	18	26	M0937_0.90$Hoxb5	HOXB5	0.000131
AP1	25	33	M0937_0.90$Hoxb5	HOXB5	0.000131
AP1	32	40	M0937_0.90$Hoxb5	HOXB5	0.000131
AP1	39	47	M0937_0.90$Hoxb5	HOXB5	0.000131
AP1	46	54	M0937_0.90$Hoxb5	HOXB5	0.000131
AP1	1	15	M3786_0.90$JUN	JUN	0.000131
AP1	8	22	M3786_0.90$JUN	JUN	0.000131
AP1	15	29	M3786_0.90$JUN	JUN	0.000131
AP1	22	36	M3786_0.90$JUN	JUN	0.000131
AP1	29	43	M3786_0.90$JUN	JUN	0.000131
AP1	36	50	M3786_0.90$JUN	JUN	0.000131
AP1	4	13	M0996_0.90$Hoxa3	HOXA3	0.000143
AP1	11	20	M0996_0.90$Hoxa3	HOXA3	0.000143
AP1	18	27	M0996_0.90$Hoxa3	HOXA3	0.000143
AP1	25	34	M0996_0.90$Hoxa3	HOXA3	0.000143
AP1	32	41	M0996_0.90$Hoxa3	HOXA3	0.000143
AP1	39	48	M0996_0.90$Hoxa3	HOXA3	0.000143
AP1	46	55	M0996_0.90$Hoxa3	HOXA3	0.000143
AP1	4	10	V$IPF1_Q5	IPF1	0.000144
AP1	11	17	V$IPF1_Q5	IPF1	0.000144
AP1	18	24	V$IPF1_Q5	IPF1	0.000144
AP1	25	31	V$IPF1_Q5	IPF1	0.000144
AP1	32	38	V$IPF1_Q5	IPF1	0.000144
AP1	39	45	V$IPF1_Q5	IPF1	0.000144
AP1	46	52	V$IPF1_Q5	IPF1	0.000144
AP1	4	10	V$ISL2_02	ISL2	0.000144
AP1	11	17	V$ISL2_02	ISL2	0.000144
AP1	18	24	V$ISL2_02	ISL2	0.000144
AP1	25	31	V$ISL2_02	ISL2	0.000144
AP1	32	38	V$ISL2_02	ISL2	0.000144
AP1	39	45	V$ISL2_02	ISL2	0.000144
AP1	46	52	V$ISL2_02	ISL2	0.000144
AP1	4	11	M5088_0.90$VAX1	VAX1	0.000147
AP1	11	18	M5088_0.90$VAX1	VAX1	0.000147
AP1	18	25	M5088_0.90$VAX1	VAX1	0.000147
AP1	25	32	M5088_0.90$VAX1	VAX1	0.000147
AP1	32	39	M5088_0.90$VAX1	VAX1	0.000147
AP1	39	46	M5088_0.90$VAX1	VAX1	0.000147
AP1	46	53	M5088_0.90$VAX1	VAX1	0.000147
AP1	4	11	V$VAX1_03	VAX1	0.000147
AP1	11	18	V$VAX1_03	VAX1	0.000147
AP1	18	25	V$VAX1_03	VAX1	0.000147
AP1	25	32	V$VAX1_03	VAX1	0.000147
AP1	32	39	V$VAX1_03	VAX1	0.000147
AP1	39	46	V$VAX1_03	VAX1	0.000147
AP1	46	53	V$VAX1_03	VAX1	0.000147
AP1	4	12	M0926_0.90$Gsx2	GSX2	0.00016
AP1	11	19	M0926_0.90$Gsx2	GSX2	0.00016
AP1	18	26	M0926_0.90$Gsx2	GSX2	0.00016
AP1	25	33	M0926_0.90$Gsx2	GSX2	0.00016
AP1	32	40	M0926_0.90$Gsx2	GSX2	0.00016
AP1	39	47	M0926_0.90$Gsx2	GSX2	0.00016
AP1	46	54	M0926_0.90$Gsx2	GSX2	0.00016
AP1	1	8	V$AP1_Q6_02	AP1	0.000161
AP1	8	15	V$AP1_Q6_02	AP1	0.000161
AP1	15	22	V$AP1_Q6_02	AP1	0.000161
AP1	22	29	V$AP1_Q6_02	AP1	0.000161
AP1	29	36	V$AP1_Q6_02	AP1	0.000161
AP1	36	43	V$AP1_Q6_02	AP1	0.000161
AP1	43	50	V$AP1_Q6_02	AP1	0.000161
AP1	4	12	M0906_0.90$Hoxa1	HOXA1	0.000176
AP1	11	19	M0906_0.90$Hoxa1	HOXA1	0.000176
AP1	18	26	M0906_0.90$Hoxa1	HOXA1	0.000176
AP1	25	33	M0906_0.90$Hoxa1	HOXA1	0.000176
AP1	32	40	M0906_0.90$Hoxa1	HOXA1	0.000176
AP1	39	47	M0906_0.90$Hoxa1	HOXA1	0.000176
AP1	46	54	M0906_0.90$Hoxa1	HOXA1	0.000176
AP1	6	16	V$AP1_Q4	AP1	0.000187
AP1	13	23	V$AP1_Q4	AP1	0.000187
AP1	20	30	V$AP1_Q4	AP1	0.000187
AP1	27	37	V$AP1_Q4	AP1	0.000187
AP1	34	44	V$AP1_Q4	AP1	0.000187
AP1	41	51	V$AP1_Q4	AP1	0.000187
AP1	6	16	V$AP1_Q6	AP1	0.000204
AP1	13	23	V$AP1_Q6	AP1	0.000204
AP1	20	30	V$AP1_Q6	AP1	0.000204
AP1	27	37	V$AP1_Q6	AP1	0.000204
AP1	34	44	V$AP1_Q6	AP1	0.000204
AP1	41	51	V$AP1_Q6	AP1	0.000204
AP1	2	23	V$TCF11MAFG_01	TCF11MAFG	0.000216
AP1	9	30	V$TCF11MAFG_01	TCF11MAFG	0.000216
AP1	16	37	V$TCF11MAFG_01	TCF11MAFG	0.000216
AP1	23	44	V$TCF11MAFG_01	TCF11MAFG	0.000216
AP1	30	51	V$TCF11MAFG_01	TCF11MAFG	0.000216
AP1	1	8	V$JUNB_Q6	JUNB	0.000227
AP1	8	15	V$JUNB_Q6	JUNB	0.000227
AP1	15	22	V$JUNB_Q6	JUNB	0.000227
AP1	22	29	V$JUNB_Q6	JUNB	0.000227
AP1	29	36	V$JUNB_Q6	JUNB	0.000227
AP1	36	43	V$JUNB_Q6	JUNB	0.000227
AP1	43	50	V$JUNB_Q6	JUNB	0.000227
AP1	7	15	V$CFOSCJUN_Q5	CFOSCJUN	0.000235
AP1	14	22	V$CFOSCJUN_Q5	CFOSCJUN	0.000235
AP1	21	29	V$CFOSCJUN_Q5	CFOSCJUN	0.000235
AP1	28	36	V$CFOSCJUN_Q5	CFOSCJUN	0.000235
AP1	35	43	V$CFOSCJUN_Q5	CFOSCJUN	0.000235
AP1	42	50	V$CFOSCJUN_Q5	CFOSCJUN	0.000235
AP1	7	23	V$EVX1_01	EVX1	0.000235
AP1	14	30	V$EVX1_01	EVX1	0.000235
AP1	21	37	V$EVX1_01	EVX1	0.000235
AP1	28	44	V$EVX1_01	EVX1	0.000235
AP1	35	51	V$EVX1_01	EVX1	0.000235
AP1	4	12	M0951_0.90$Hoxa6	HOXA6	0.000238
AP1	11	19	M0951_0.90$Hoxa6	HOXA6	0.000238
AP1	18	26	M0951_0.90$Hoxa6	HOXA6	0.000238
AP1	25	33	M0951_0.90$Hoxa6	HOXA6	0.000238
AP1	32	40	M0951_0.90$Hoxa6	HOXA6	0.000238
AP1	39	47	M0951_0.90$Hoxa6	HOXA6	0.000238
AP1	46	54	M0951_0.90$Hoxa6	HOXA6	0.000238
AP1	6	16	M3803_0.90$JUN	JUN	0.000242
AP1	13	23	M3803_0.90$JUN	JUN	0.000242
AP1	20	30	M3803_0.90$JUN	JUN	0.000242
AP1	27	37	M3803_0.90$JUN	JUN	0.000242
AP1	34	44	M3803_0.90$JUN	JUN	0.000242
AP1	41	51	M3803_0.90$JUN	JUN	0.000242
AP1	3	10	M0840_0.90$Evx2	EVX2	0.000249
AP1	10	17	M0840_0.90$Evx2	EVX2	0.000249
AP1	17	24	M0840_0.90$Evx2	EVX2	0.000249
AP1	24	31	M0840_0.90$Evx2	EVX2	0.000249
AP1	31	38	M0840_0.90$Evx2	EVX2	0.000249
AP1	38	45	M0840_0.90$Evx2	EVX2	0.000249
AP1	45	52	M0840_0.90$Evx2	EVX2	0.000249
AP1	7	14	M1817_0.90$Fos	FOS	0.000253
AP1	14	21	M1817_0.90$Fos	FOS	0.000253
AP1	21	28	M1817_0.90$Fos	FOS	0.000253
AP1	28	35	M1817_0.90$Fos	FOS	0.000253
AP1	35	42	M1817_0.90$Fos	FOS	0.000253
AP1	42	49	M1817_0.90$Fos	FOS	0.000253
AP1	49	56	M1817_0.90$Fos	FOS	0.000253
AP1	3	12	M4685_0.90$HOXB2	HOXB2	0.00026
AP1	10	19	M4685_0.90$HOXB2	HOXB2	0.00026
AP1	17	26	M4685_0.90$HOXB2	HOXB2	0.00026
AP1	24	33	M4685_0.90$HOXB2	HOXB2	0.00026
AP1	31	40	M4685_0.90$HOXB2	HOXB2	0.00026
AP1	38	47	M4685_0.90$HOXB2	HOXB2	0.00026
AP1	45	54	M4685_0.90$HOXB2	HOXB2	0.00026
AP1	3	10	M0877_0.90$Pou4f3	POU4F3	0.000262
AP1	10	17	M0877_0.90$Pou4f3	POU4F3	0.000262
AP1	17	24	M0877_0.90$Pou4f3	POU4F3	0.000262
AP1	24	31	M0877_0.90$Pou4f3	POU4F3	0.000262
AP1	31	38	M0877_0.90$Pou4f3	POU4F3	0.000262
AP1	38	45	M0877_0.90$Pou4f3	POU4F3	0.000262
AP1	45	52	M0877_0.90$Pou4f3	POU4F3	0.000262
AP1	5	19	M3736_0.90$JUND	JUND	0.000283
AP1	12	26	M3736_0.90$JUND	JUND	0.000283
AP1	19	33	M3736_0.90$JUND	JUND	0.000283
AP1	26	40	M3736_0.90$JUND	JUND	0.000283
AP1	33	47	M3736_0.90$JUND	JUND	0.000283
AP1	40	54	M3736_0.90$JUND	JUND	0.000283
AP1	4	11	M0938_0.90$Hoxb7	HOXB7	0.000286
AP1	11	18	M0938_0.90$Hoxb7	HOXB7	0.000286
AP1	18	25	M0938_0.90$Hoxb7	HOXB7	0.000286
AP1	25	32	M0938_0.90$Hoxb7	HOXB7	0.000286
AP1	32	39	M0938_0.90$Hoxb7	HOXB7	0.000286
AP1	39	46	M0938_0.90$Hoxb7	HOXB7	0.000286
AP1	46	53	M0938_0.90$Hoxb7	HOXB7	0.000286
AP1	3	18	V$JUNDM2_04	JUNDM2	0.000293
AP1	10	25	V$JUNDM2_04	JUNDM2	0.000293
AP1	17	32	V$JUNDM2_04	JUNDM2	0.000293
AP1	24	39	V$JUNDM2_04	JUNDM2	0.000293
AP1	31	46	V$JUNDM2_04	JUNDM2	0.000293
AP1	38	53	V$JUNDM2_04	JUNDM2	0.000293
AP1	4	12	M0934_0.90$Hoxa7	HOXA7	0.000307
AP1	11	19	M0934_0.90$Hoxa7	HOXA7	0.000307
AP1	18	26	M0934_0.90$Hoxa7	HOXA7	0.000307
AP1	25	33	M0934_0.90$Hoxa7	HOXA7	0.000307
AP1	32	40	M0934_0.90$Hoxa7	HOXA7	0.000307
AP1	39	47	M0934_0.90$Hoxa7	HOXA7	0.000307
AP1	46	54	M0934_0.90$Hoxa7	HOXA7	0.000307
AP1	4	15	V$HNF1B_04	HNF1B	0.000309
AP1	11	22	V$HNF1B_04	HNF1B	0.000309
AP1	18	29	V$HNF1B_04	HNF1B	0.000309
AP1	25	36	V$HNF1B_04	HNF1B	0.000309
AP1	32	43	V$HNF1B_04	HNF1B	0.000309
AP1	39	50	V$HNF1B_04	HNF1B	0.000309
AP1	4	21	V$LHX8_03	LHX8	0.000313
AP1	11	28	V$LHX8_03	LHX8	0.000313
AP1	18	35	V$LHX8_03	LHX8	0.000313
AP1	25	42	V$LHX8_03	LHX8	0.000313
AP1	32	49	V$LHX8_03	LHX8	0.000313
AP1	39	56	V$LHX8_03	LHX8	0.000313
AP1	6	19	V$CDX2_Q5	CDX2	0.000314
AP1	13	26	V$CDX2_Q5	CDX2	0.000314
AP1	20	33	V$CDX2_Q5	CDX2	0.000314
AP1	27	40	V$CDX2_Q5	CDX2	0.000314
AP1	34	47	V$CDX2_Q5	CDX2	0.000314
AP1	41	54	V$CDX2_Q5	CDX2	0.000314
AP1	5	20	V$LHX6_06	LHX6	0.000317
AP1	12	27	V$LHX6_06	LHX6	0.000317
AP1	19	34	V$LHX6_06	LHX6	0.000317
AP1	26	41	V$LHX6_06	LHX6	0.000317
AP1	33	48	V$LHX6_06	LHX6	0.000317
AP1	40	55	V$LHX6_06	LHX6	0.000317
AP1	4	10	M0873_0.90$Hoxc5	HOXC5	0.00032
AP1	11	17	M0873_0.90$Hoxc5	HOXC5	0.00032
AP1	18	24	M0873_0.90$Hoxc5	HOXC5	0.00032
AP1	25	31	M0873_0.90$Hoxc5	HOXC5	0.00032
AP1	32	38	M0873_0.90$Hoxc5	HOXC5	0.00032
AP1	39	45	M0873_0.90$Hoxc5	HOXC5	0.00032
AP1	46	52	M0873_0.90$Hoxc5	HOXC5	0.00032
AP1	3	12	M0823_0.90$POU6F1	POU6F1	0.00032
AP1	10	19	M0823_0.90$POU6F1	POU6F1	0.00032
AP1	17	26	M0823_0.90$POU6F1	POU6F1	0.00032
AP1	24	33	M0823_0.90$POU6F1	POU6F1	0.00032
AP1	31	40	M0823_0.90$POU6F1	POU6F1	0.00032
AP1	38	47	M0823_0.90$POU6F1	POU6F1	0.00032
AP1	45	54	M0823_0.90$POU6F1	POU6F1	0.00032
AP1	2	11	M0813_0.90$LHX2	LHX2	0.000326
AP1	9	18	M0813_0.90$LHX2	LHX2	0.000326
AP1	16	25	M0813_0.90$LHX2	LHX2	0.000326
AP1	23	32	M0813_0.90$LHX2	LHX2	0.000326
AP1	30	39	M0813_0.90$LHX2	LHX2	0.000326
AP1	37	46	M0813_0.90$LHX2	LHX2	0.000326
AP1	44	53	M0813_0.90$LHX2	LHX2	0.000326
AP1	7	15	V$AP1_C	AP1	0.000334
AP1	14	22	V$AP1_C	AP1	0.000334
AP1	21	29	V$AP1_C	AP1	0.000334
AP1	28	36	V$AP1_C	AP1	0.000334
AP1	35	43	V$AP1_C	AP1	0.000334
AP1	42	50	V$AP1_C	AP1	0.000334
AP1	3	12	M4572_0.90$EVX2	EVX2	0.000346
AP1	10	19	M4572_0.90$EVX2	EVX2	0.000346
AP1	17	26	M4572_0.90$EVX2	EVX2	0.000346
AP1	24	33	M4572_0.90$EVX2	EVX2	0.000346
AP1	31	40	M4572_0.90$EVX2	EVX2	0.000346
AP1	38	47	M4572_0.90$EVX2	EVX2	0.000346
AP1	45	54	M4572_0.90$EVX2	EVX2	0.000346
AP1	1	8	V$CFOS_Q6	CFOS	0.000348
AP1	8	15	V$CFOS_Q6	CFOS	0.000348
AP1	15	22	V$CFOS_Q6	CFOS	0.000348
AP1	22	29	V$CFOS_Q6	CFOS	0.000348
AP1	29	36	V$CFOS_Q6	CFOS	0.000348
AP1	36	43	V$CFOS_Q6	CFOS	0.000348
AP1	43	50	V$CFOS_Q6	CFOS	0.000348
AP1	3	12	M4768_0.90$MEOX2	MEOX2	0.000351
AP1	10	19	M4768_0.90$MEOX2	MEOX2	0.000351
AP1	17	26	M4768_0.90$MEOX2	MEOX2	0.000351
AP1	24	33	M4768_0.90$MEOX2	MEOX2	0.000351
AP1	31	40	M4768_0.90$MEOX2	MEOX2	0.000351
AP1	38	47	M4768_0.90$MEOX2	MEOX2	0.000351
AP1	45	54	M4768_0.90$MEOX2	MEOX2	0.000351
AP1	7	15	M0317_0.90$Jund	JUND	0.000369
AP1	14	22	M0317_0.90$Jund	JUND	0.000369
AP1	21	29	M0317_0.90$Jund	JUND	0.000369
AP1	28	36	M0317_0.90$Jund	JUND	0.000369
AP1	35	43	M0317_0.90$Jund	JUND	0.000369
AP1	42	50	M0317_0.90$Jund	JUND	0.000369
AP1	4	11	M5196_0.90$Meox2	MEOX2	0.00038
AP1	11	18	M5196_0.90$Meox2	MEOX2	0.00038
AP1	18	25	M5196_0.90$Meox2	MEOX2	0.00038
AP1	25	32	M5196_0.90$Meox2	MEOX2	0.00038
AP1	32	39	M5196_0.90$Meox2	MEOX2	0.00038
AP1	39	46	M5196_0.90$Meox2	MEOX2	0.00038
AP1	46	53	M5196_0.90$Meox2	MEOX2	0.00038
AP1	4	11	V$MEOX2_04	MEOX2	0.00038
AP1	11	18	V$MEOX2_04	MEOX2	0.00038
AP1	18	25	V$MEOX2_04	MEOX2	0.00038
AP1	25	32	V$MEOX2_04	MEOX2	0.00038
AP1	32	39	V$MEOX2_04	MEOX2	0.00038
AP1	39	46	V$MEOX2_04	MEOX2	0.00038
AP1	46	53	V$MEOX2_04	MEOX2	0.00038
AP1	5	20	V$HNF1B_Q6	HNF1B	0.000393
AP1	12	27	V$HNF1B_Q6	HNF1B	0.000393
AP1	19	34	V$HNF1B_Q6	HNF1B	0.000393
AP1	26	41	V$HNF1B_Q6	HNF1B	0.000393
AP1	33	48	V$HNF1B_Q6	HNF1B	0.000393
AP1	40	55	V$HNF1B_Q6	HNF1B	0.000393
AP1	1	16	V$HB9_01	HB9	0.000396
AP1	8	23	V$HB9_01	HB9	0.000396
AP1	15	30	V$HB9_01	HB9	0.000396
AP1	22	37	V$HB9_01	HB9	0.000396
AP1	29	44	V$HB9_01	HB9	0.000396
AP1	36	51	V$HB9_01	HB9	0.000396
AP1	6	21	V$HOXB6_01	HOXB6	0.000397
AP1	13	28	V$HOXB6_01	HOXB6	0.000397
AP1	20	35	V$HOXB6_01	HOXB6	0.000397
AP1	27	42	V$HOXB6_01	HOXB6	0.000397
AP1	34	49	V$HOXB6_01	HOXB6	0.000397
AP1	41	56	V$HOXB6_01	HOXB6	0.000397
AP1	4	11	M0856_0.90$Lhx9	LHX9	0.000413
AP1	11	18	M0856_0.90$Lhx9	LHX9	0.000413
AP1	18	25	M0856_0.90$Lhx9	LHX9	0.000413
AP1	25	32	M0856_0.90$Lhx9	LHX9	0.000413
AP1	32	39	M0856_0.90$Lhx9	LHX9	0.000413
AP1	39	46	M0856_0.90$Lhx9	LHX9	0.000413
AP1	46	53	M0856_0.90$Lhx9	LHX9	0.000413
AP1	4	12	M0933_0.90$Hoxa7	HOXA7	0.000415
AP1	11	19	M0933_0.90$Hoxa7	HOXA7	0.000415
AP1	18	26	M0933_0.90$Hoxa7	HOXA7	0.000415
AP1	25	33	M0933_0.90$Hoxa7	HOXA7	0.000415
AP1	32	40	M0933_0.90$Hoxa7	HOXA7	0.000415
AP1	39	47	M0933_0.90$Hoxa7	HOXA7	0.000415
AP1	46	54	M0933_0.90$Hoxa7	HOXA7	0.000415
AP1	6	22	M3824_0.90$NFE2	NFE2	0.000419
AP1	13	29	M3824_0.90$NFE2	NFE2	0.000419
AP1	20	36	M3824_0.90$NFE2	NFE2	0.000419
AP1	27	43	M3824_0.90$NFE2	NFE2	0.000419
AP1	34	50	M3824_0.90$NFE2	NFE2	0.000419
AP1	4	20	V$POU1F1_03	POU1F1	0.000426
AP1	11	27	V$POU1F1_03	POU1F1	0.000426
AP1	18	34	V$POU1F1_03	POU1F1	0.000426
AP1	25	41	V$POU1F1_03	POU1F1	0.000426
AP1	32	48	V$POU1F1_03	POU1F1	0.000426
AP1	39	55	V$POU1F1_03	POU1F1	0.000426
AP1	4	11	M0844_0.90$Rhox6	RHOX6	0.000437
AP1	11	18	M0844_0.90$Rhox6	RHOX6	0.000437
AP1	18	25	M0844_0.90$Rhox6	RHOX6	0.000437
AP1	25	32	M0844_0.90$Rhox6	RHOX6	0.000437
AP1	32	39	M0844_0.90$Rhox6	RHOX6	0.000437
AP1	39	46	M0844_0.90$Rhox6	RHOX6	0.000437
AP1	46	53	M0844_0.90$Rhox6	RHOX6	0.000437
AP1	4	12	M0978_0.90$Bsx	BSX	0.00044
AP1	11	19	M0978_0.90$Bsx	BSX	0.00044
AP1	18	26	M0978_0.90$Bsx	BSX	0.00044
AP1	25	33	M0978_0.90$Bsx	BSX	0.00044
AP1	32	40	M0978_0.90$Bsx	BSX	0.00044
AP1	39	47	M0978_0.90$Bsx	BSX	0.00044
AP1	46	54	M0978_0.90$Bsx	BSX	0.00044
AP1	5	15	M3814_0.90$FOSL1	FOSL1	0.00044
AP1	12	22	M3814_0.90$FOSL1	FOSL1	0.00044
AP1	19	29	M3814_0.90$FOSL1	FOSL1	0.00044
AP1	26	36	M3814_0.90$FOSL1	FOSL1	0.00044
AP1	33	43	M3814_0.90$FOSL1	FOSL1	0.00044
AP1	40	50	M3814_0.90$FOSL1	FOSL1	0.00044
AP1	3	15	V$HNF1B_06	HNF1B	0.000444
AP1	10	22	V$HNF1B_06	HNF1B	0.000444
AP1	17	29	V$HNF1B_06	HNF1B	0.000444
AP1	24	36	V$HNF1B_06	HNF1B	0.000444
AP1	31	43	V$HNF1B_06	HNF1B	0.000444
AP1	38	50	V$HNF1B_06	HNF1B	0.000444
AP1	5	19	M3820_0.90$JUND	JUND	0.000448
AP1	12	26	M3820_0.90$JUND	JUND	0.000448
AP1	19	33	M3820_0.90$JUND	JUND	0.000448
AP1	26	40	M3820_0.90$JUND	JUND	0.000448
AP1	33	47	M3820_0.90$JUND	JUND	0.000448
AP1	40	54	M3820_0.90$JUND	JUND	0.000448
AP1	4	12	M0914_0.90$Barx2	BARX2	0.000491
AP1	11	19	M0914_0.90$Barx2	BARX2	0.000491
AP1	18	26	M0914_0.90$Barx2	BARX2	0.000491
AP1	25	33	M0914_0.90$Barx2	BARX2	0.000491
AP1	32	40	M0914_0.90$Barx2	BARX2	0.000491
AP1	39	47	M0914_0.90$Barx2	BARX2	0.000491
AP1	46	54	M0914_0.90$Barx2	BARX2	0.000491
AP1	5	15	M3701_0.90$JUND	JUND	0.000492
AP1	12	22	M3701_0.90$JUND	JUND	0.000492
AP1	19	29	M3701_0.90$JUND	JUND	0.000492
AP1	26	36	M3701_0.90$JUND	JUND	0.000492
AP1	33	43	M3701_0.90$JUND	JUND	0.000492
AP1	40	50	M3701_0.90$JUND	JUND	0.000492
AP1	6	16	V$AP1_Q2	AP1	0.000497
AP1	13	23	V$AP1_Q2	AP1	0.000497
AP1	20	30	V$AP1_Q2	AP1	0.000497
AP1	27	37	V$AP1_Q2	AP1	0.000497
AP1	34	44	V$AP1_Q2	AP1	0.000497
AP1	41	51	V$AP1_Q2	AP1	0.000497
AP1	1	16	V$BARX2_01	BARX2	0.000499
AP1	8	23	V$BARX2_01	BARX2	0.000499
AP1	15	30	V$BARX2_01	BARX2	0.000499
AP1	22	37	V$BARX2_01	BARX2	0.000499
AP1	29	44	V$BARX2_01	BARX2	0.000499
AP1	36	51	V$BARX2_01	BARX2	0.000499
AP2	15	24	V$RNF96_01	RNF96	3.39e-07
AP2	41	50	V$RNF96_01	RNF96	3.39e-07
AP2	14	24	V$AP2ALPHA_Q6	AP2ALPHA	4.75e-07
AP2	40	50	V$AP2ALPHA_Q6	AP2ALPHA	4.75e-07
AP2	15	24	V$AP2GAMMA_Q5_01	AP2GAMMA	1.09e-06
AP2	41	50	V$AP2GAMMA_Q5_01	AP2GAMMA	1.09e-06
AP2	14	23	M0085_0.90$Tcfap2c	TCFAP2C	4.33e-06
AP2	40	49	M0085_0.90$Tcfap2c	TCFAP2C	4.33e-06
AP2	11	25	V$ZIC4_01	ZIC4	4.53e-06
AP2	37	51	V$ZIC4_01	ZIC4	4.53e-06
AP2	18	26	M0422_0.90$Zfx	ZFX	7.4e-06
AP2	44	52	M0422_0.90$Zfx	ZFX	7.4e-06
AP2	11	24	V$GLIS2_05	GLIS2	8.9e-06
AP2	37	50	V$GLIS2_05	GLIS2	8.9e-06
AP2	14	25	V$AP2_Q6	AP2	1.05e-05
AP2	40	51	V$AP2_Q6	AP2	1.05e-05
AP2	15	24	V$CNOT3_01	CNOT3	1.14e-05
AP2	41	50	V$CNOT3_01	CNOT3	1.14e-05
AP2	12	26	V$AP2ALPHA_02	AP2ALPHA	1.33e-05
AP2	38	52	V$AP2ALPHA_02	AP2ALPHA	1.33e-05
AP2	15	23	V$AP2ALPHA_01	AP2ALPHA	1.42e-05
AP2	41	49	V$AP2ALPHA_01	AP2ALPHA	1.42e-05
AP2	15	23	V$AP2GAMMA_01	AP2GAMMA	1.45e-05
AP2	41	49	V$AP2GAMMA_01	AP2GAMMA	1.45e-05
AP2	15	30	V$AP2_Q3	AP2	1.49e-05
AP2	11	25	V$ZIC3_06	ZIC3	1.62e-05
AP2	37	51	V$ZIC3_06	ZIC3	1.62e-05
AP2	41	56	V$AP2_Q3	AP2	1.68e-05
AP2	11	24	V$GLI2_03	GLI2	1.91e-05
AP2	37	50	V$GLI2_03	GLI2	1.91e-05
AP2	11	24	V$ZIC1_06	ZIC1	2.21e-05
AP2	37	50	V$ZIC1_06	ZIC1	2.21e-05
AP2	13	25	V$AP2_Q6_01	AP2	2.33e-05
AP2	39	51	V$AP2_Q6_01	AP2	2.33e-05
AP2	15	23	M1726_0.90$TFAP2A	TFAP2A	2.9e-05
AP2	41	49	M1726_0.90$TFAP2A	TFAP2A	2.9e-05
AP2	14	24	V$TFAP2A_03	TFAP2A	3.02e-05
AP2	40	50	V$TFAP2A_03	TFAP2A	3.02e-05
AP2	14	23	V$WT1_Q6_01	WT1	3.09e-05
AP2	40	49	V$WT1_Q6_01	WT1	3.09e-05
AP2	14	24	V$TFAP2A_06	TFAP2A	4.08e-05
AP2	40	50	V$TFAP2A_06	TFAP2A	4.08e-05
AP2	15	24	M0556_0.90$DNMT1	DNMT1	4.12e-05
AP2	41	50	M0556_0.90$DNMT1	DNMT1	4.12e-05
AP2	10	25	V$LXRDR4_Q3	LXRDR4	4.65e-05
AP2	36	51	V$LXRDR4_Q3	LXRDR4	4.65e-05
AP2	17	31	M3624_0.90$USF1	USF1	5.03e-05
AP2	18	32	M3675_0.90$USF1	USF1	5.07e-05
AP2	17	32	M3710_0.90$USF2	USF2	5.13e-05
AP2	17	31	M3676_0.90$USF2	USF2	5.2e-05
AP2	14	25	V$TFAP2A_02	TFAP2A	5.84e-05
AP2	40	51	V$TFAP2A_02	TFAP2A	5.84e-05
AP2	17	31	M3709_0.90$USF1	USF1	6.01e-05
AP2	14	24	V$TFAP2B_03	TFAP2B	6.3e-05
AP2	40	50	V$TFAP2B_03	TFAP2B	6.3e-05
AP2	10	26	V$DR4_Q2	DR4	6.47e-05
AP2	36	52	V$DR4_Q2	DR4	6.47e-05
AP2	14	25	V$TFAP2A_05	TFAP2A	6.99e-05
AP2	40	51	V$TFAP2A_05	TFAP2A	6.99e-05
AP2	12	26	V$TCFAP2E_03	TCFAP2E	7.32e-05
AP2	38	52	V$TCFAP2E_03	TCFAP2E	7.32e-05
AP2	22	31	M0172_0.90$Tcfe3	TCFE3	7.89e-05
AP2	22	31	M0200_0.90$Tcfec	TCFEC	7.94e-05
AP2	22	31	M0206_0.90$Mitf	MITF	7.99e-05
AP2	14	25	V$TFAP2C_01	TFAP2C	8.17e-05
AP2	40	51	V$TFAP2C_01	TFAP2C	8.17e-05
AP2	11	21	V$GLI1_01	GLI1	0.000103
AP2	37	47	V$GLI1_01	GLI1	0.000103
AP2	8	17	M1344_0.90$NR2E1	NR2E1	0.000114
AP2	34	43	M1344_0.90$NR2E1	NR2E1	0.000114
AP2	12	26	V$AP2ALPHA_03	AP2ALPHA	0.000121
AP2	38	52	V$AP2ALPHA_03	AP2ALPHA	0.000121
AP2	14	24	V$DEC1_Q2	DEC1	0.000123
AP2	40	50	V$DEC1_Q2	DEC1	0.000123
AP2	9	27	V$LXR_Q6	LXR	0.000126
AP2	35	53	V$LXR_Q6	LXR	0.000126
AP2	10	26	V$SP1_Q6_02	SP1	0.00013
AP2	36	52	V$SP1_Q6_02	SP1	0.00013
AP2	19	32	V$STRA13_01	STRA13	0.000133
AP2	19	32	M3832_0.90$USF1	USF1	0.000138
AP2	19	31	M3833_0.90$USF2	USF2	0.000139
AP2	19	31	M3774_0.90$USF2	USF2	0.000145
AP2	22	31	M0218_0.90$Arntl	ARNTL	0.000146
AP2	14	23	M1860_0.90$Myc	MYC	0.000146
AP2	40	49	M1860_0.90$Myc	MYC	0.000146
AP2	20	32	M3791_0.90$MAX	MAX	0.000151
AP2	13	22	M0084_0.90$Tcfap2b	TCFAP2B	0.000155
AP2	39	48	M0084_0.90$Tcfap2b	TCFAP2B	0.000155
AP2	11	21	V$GLI2_01	GLI2	0.000158
AP2	37	47	V$GLI2_01	GLI2	0.000158
AP2	10	25	V$GLIS1_01	GLIS1	0.000161
AP2	36	51	V$GLIS1_01	GLIS1	0.000161
AP2	12	26	V$TCFAP2C_03	TCFAP2C	0.000161
AP2	38	52	V$TCFAP2C_03	TCFAP2C	0.000161
AP2	22	31	M0180_0.90$Mlx	MLX	0.000165
AP2	8	27	V$HINFP_02	HINFP	0.000167
AP2	34	53	V$HINFP_02	HINFP	0.000167
AP2	16	30	M3687_0.90$PAX5	PAX5	0.000173
AP2	42	56	M3687_0.90$PAX5	PAX5	0.000176
AP2	11	21	V$GLI3_02	GLI3	0.000183
AP2	37	47	V$GLI3_02	GLI3	0.000183
AP2	2	16	V$ERALPHA_Q6_02	ERALPHA	0.000184
AP2	28	42	V$ERALPHA_Q6_02	ERALPHA	0.000184
AP2	14	23	V$MYC_01	MYC	0.000184
AP2	40	49	V$MYC_01	MYC	0.000184
AP2	11	24	V$GLIS3_01	GLIS3	0.000186
AP2	37	50	V$GLIS3_01	GLIS3	0.000186
AP2	21	30	V$BHLHE41_02	BHLHE41	0.000193
AP2	14	25	V$TFAP2B_02	TFAP2B	0.000203
AP2	40	51	V$TFAP2B_02	TFAP2B	0.000203
AP2	14	25	V$ZNF219_01	ZNF219	0.000207
AP2	40	51	V$ZNF219_01	ZNF219	0.000207
AP2	20	32	M3660_0.90$MAX	MAX	0.000208
AP2	23	31	M0179_0.90$Mlx	MLX	0.000211
AP2	9	25	V$SP1_Q6_02	SP1	0.000211
AP2	35	51	V$SP1_Q6_02	SP1	0.000211
AP2	12	26	V$TCFAP2A_03	TCFAP2A	0.000212
AP2	38	52	V$TCFAP2A_03	TCFAP2A	0.000212
AP2	14	24	V$TFAP2C_03	TFAP2C	0.000212
AP2	40	50	V$TFAP2C_03	TFAP2C	0.000212
AP2	21	30	M4776_0.90$MLX	MLX	0.000215
AP2	21	30	V$MLX_01	MLX	0.000215
AP2	20	29	M3748_0.90$BHLHE40	BHLHE40	0.000216
AP2	7	22	V$GLIS2_03	GLIS2	0.000222
AP2	33	48	V$GLIS2_03	GLIS2	0.000222
AP2	6	14	V$MYB_Q5_01	MYB	0.000222
AP2	32	40	V$MYB_Q5_01	MYB	0.000222
AP2	21	31	M3773_0.90$USF1	USF1	0.000228
AP2	23	30	M0191_0.90$Tcfeb	TCFEB	0.000232
AP2	22	29	M0187_0.90$Id2	ID2	0.000234
AP2	21	31	M3745_0.90$USF2	USF2	0.000235
AP2	9	25	V$SP4_03	SP4	0.000249
AP2	35	51	V$SP4_03	SP4	0.000249
AP2	11	22	V$HINFP_01	HINFP	0.000254
AP2	37	48	V$HINFP_01	HINFP	0.000254
AP2	48	55	M0822_0.90$ZHX1	ZHX1	0.000256
AP2	4	14	V$CMYB_Q5	CMYB	0.000261
AP2	30	40	V$CMYB_Q5	CMYB	0.000261
AP2	21	30	V$BHLHE40_02	BHLHE40	0.000262
AP2	15	31	V$SP1_Q6_02	SP1	0.000268
AP2	21	30	M5074_0.90$TFE3	TFE3	0.00027
AP2	21	30	M5075_0.90$TFEB	TFEB	0.000271
AP2	22	31	M3823_0.90$MAX	MAX	0.000272
AP2	13	23	V$SP1SP3_Q4	SP1SP3	0.00028
AP2	39	49	V$SP1SP3_Q4	SP1SP3	0.00028
AP2	20	31	V$USF_Q6_01	USF	0.000284
AP2	14	23	M1822_0.90$Mycn	MYCN	0.000286
AP2	40	49	M1822_0.90$Mycn	MYCN	0.000286
AP2	19	32	V$USF_01	USF	0.00029
AP2	8	24	V$SP1_Q6_02	SP1	0.000292
AP2	34	50	V$SP1_Q6_02	SP1	0.000292
AP2	21	30	V$BHLHE41_01	BHLHE41	0.000297
AP2	16	35	V$ARNT_02	ARNT	0.000302
AP2	17	24	V$CACD_01	CACD	0.000321
AP2	43	50	V$CACD_01	CACD	0.000321
AP2	15	24	M0083_0.90$Tcfap2a	TCFAP2A	0.000327
AP2	41	50	M0083_0.90$Tcfap2a	TCFAP2A	0.000327
AP2	21	30	V$TFE3_01	TFE3	0.000337
AP2	19	40	V$STAF_01	STAF	0.000344
AP2	21	30	V$BHLHE40_01	BHLHE40	0.000348
AP2	22	30	M0202_0.90$Bhlhe40	BHLHE40	0.000357
AP2	16	22	M0550_0.90$CGBP	CGBP	0.000359
AP2	42	48	M0550_0.90$CGBP	CGBP	0.000359
AP2	21	30	M4434_0.90$ARNTL	ARNTL	0.000363
AP2	21	30	V$ARNTL_01	ARNTL	0.000363
AP2	12	25	V$KROX_Q6	KROX	0.000364
AP2	38	51	V$KROX_Q6	KROX	0.000364
AP2	15	31	V$ZFP410_04	ZFP410	0.000366
AP2	11	26	V$EGR4_01	EGR4	0.00037
AP2	37	52	V$EGR4_01	EGR4	0.00037
AP2	21	30	M5076_0.90$TFEC	TFEC	0.000371
AP2	39	55	V$SP1_Q6_02	SP1	0.000375
AP2	13	26	V$TCFAP2C_04	TCFAP2C	0.000375
AP2	39	52	V$TCFAP2C_04	TCFAP2C	0.000375
AP2	21	30	M0199_0.90$Tcfec	TCFEC	0.000376
AP2	21	30	V$MLXIPL_01	MLXIPL	0.00039
AP2	8	26	V$HINFP_03	HINFP	0.000392
AP2	34	52	V$HINFP_03	HINFP	0.000392
AP2	11	27	V$SP1_Q6_02	SP1	0.000398
AP2	37	53	V$SP1_Q6_02	SP1	0.000398
AP2	21	30	V$TFEB_01	TFEB	0.00041
AP2	15	22	V$ZF5_01	ZF5	0.000417
AP2	41	48	V$ZF5_01	ZF5	0.000417
AP2	21	30	V$TFEB_02	TFEB	0.000421
AP2	11	25	V$EGR3_02	EGR3	0.000422
AP2	37	51	V$EGR3_02	EGR3	0.000422
AP2	10	15	V$FXR_Q5	FXR	0.000432
AP2	36	41	V$FXR_Q5	FXR	0.000432
AP2	13	26	V$TCFAP2B_03	TCFAP2B	0.000432
AP2	39	52	V$TCFAP2B_03	TCFAP2B	0.000432
AP2	7	17	V$MAFB_Q4	MAFB	0.000434
AP2	33	43	V$MAFB_Q4	MAFB	0.000434
AP2	11	25	V$EGR2_02	EGR2	0.000435
AP2	37	51	V$EGR2_02	EGR2	0.000435
AP2	22	32	M3841_0.90$MAX	MAX	0.000435
AP2	12	25	V$EGR1_06	EGR1	0.000437
AP2	38	51	V$EGR1_06	EGR1	0.000437
AP2	13	29	V$SP1_Q6_02	SP1	0.000454
AP2	26	37	V$BDP1_01	BDP1	0.00046
AP2	40	55	V$RUNX2_01	RUNX2	0.000464
AP2	11	19	V$CKROX_Q2	CKROX	0.000468
AP2	37	45	V$CKROX_Q2	CKROX	0.000468
AP2	40	55	V$RUNX3_01	RUNX3	0.00047
AP2	13	26	M1859_0.90$Zfx	ZFX	0.000473
AP2	39	52	M1859_0.90$Zfx	ZFX	0.000473
AP2	20	40	M3831_0.90$THAP1	THAP1	0.000474
AP2	21	38	M3764_0.90$HSF1	HSF1	0.000489
AP2	19	31	V$USF2_Q6_01	USF2	0.000489
AP2	10	24	M3650_0.90$CTCF	CTCF	0.000498
AP2	36	50	M3650_0.90$CTCF	CTCF	0.000498
AP3	5	16	V$NFKB_C	NFKB	3.75e-07
AP3	27	38	V$NFKB_C	NFKB	3.75e-07
AP3	4	17	V$NFKB_Q6	NFKB	9.72e-07
AP3	26	39	V$NFKB_Q6	NFKB	9.72e-07
AP3	6	17	V$RELA_Q6	RELA	2.53e-06
AP3	28	39	V$RELA_Q6	RELA	2.53e-06
AP3	6	15	V$NFKAPPAB_01	NFKAPPAB	3.01e-06
AP3	28	37	V$NFKAPPAB_01	NFKAPPAB	3.01e-06
AP3	6	15	V$NFKAPPAB65_01	NFKAPPAB65	4.06e-06
AP3	28	37	V$NFKAPPAB65_01	NFKAPPAB65	4.06e-06
AP3	5	16	V$CREL_Q6	CREL	5.49e-06
AP3	27	38	V$CREL_Q6	CREL	5.49e-06
AP3	6	15	V$CREL_01	CREL	6.18e-06
AP3	28	37	V$CREL_01	CREL	6.18e-06
AP3	8	21	V$BCL6_02	BCL6	7e-06
AP3	30	43	V$BCL6_02	BCL6	7e-06
AP3	6	15	V$RELBP52_01	RELBP52	1.11e-05
AP3	28	37	V$RELBP52_01	RELBP52	1.11e-05
AP3	14	29	V$SPDEF_04	SPDEF	3.54e-05
AP3	4	16	V$P50P50_Q3	P50P50	4.22e-05
AP3	26	38	V$P50P50_Q3	P50P50	4.22e-05
AP3	6	14	V$LTF_Q6	LTF	4.68e-05
AP3	28	36	V$LTF_Q6	LTF	4.68e-05
AP3	20	35	V$EGR1_04	EGR1	5.87e-05
AP3	11	17	V$NFAT2_Q5	NFAT2	6.51e-05
AP3	33	39	V$NFAT2_Q5	NFAT2	6.51e-05
AP3	6	15	V$NFKAPPAB50_01	NFKAPPAB50	6.78e-05
AP3	28	37	V$NFKAPPAB50_01	NFKAPPAB50	6.78e-05
AP3	6	17	V$P50RELAP65_Q5_01	P50RELAP65	0.000204
AP3	28	39	V$P50RELAP65_Q5_01	P50RELAP65	0.000204
AP3	8	19	M1809_0.90$TEAD1	TEAD1	0.000227
AP3	30	41	M1809_0.90$TEAD1	TEAD1	0.000227
AP3	8	19	V$TEF_01	TEF	0.000252
AP3	30	41	V$TEF_01	TEF	0.000252
AP3	9	25	V$TEAD1_04	TEAD1	0.000261
AP3	22	30	V$HOXA3_01	HOXA3	0.000268
AP3	10	26	V$ZNF282_01	ZNF282	0.000303
AP3	2	21	V$TBX5_04	TBX5	0.000313
AP3	24	43	V$TBX5_04	TBX5	0.000313
AP3	2	21	V$TBX4_02	TBX4	0.000342
AP3	24	43	V$TBX4_02	TBX4	0.000342
AP3	9	25	M5050_0.90$TEAD3	TEAD3	0.000372
AP3	9	25	V$TEAD3_01	TEAD3	0.000372
AP3	4	14	V$PAX_Q6	PAX	0.000377
AP3	26	36	V$PAX_Q6	PAX	0.000377
AP3	13	32	V$TBX1_05	TBX1	0.000409
AP3	12	33	V$GATA3_05	GATA3	0.00043
AP3	17	23	V$TAL1_Q6_01	TAL1	0.000433
AP3	3	18	M5033_0.90$TBX21	TBX21	0.000459
AP3	25	40	M5033_0.90$TBX21	TBX21	0.000459
AP3	3	24	V$MEF2_04	MEF2	0.00049
AP4	5	22	V$AP4_01	AP4	8.72e-08
AP4	27	44	V$AP4_01	AP4	8.72e-08
AP4	15	23	V$TEF1_Q6_03	TEF1	8.06e-06
AP4	37	45	V$TEF1_Q6_03	TEF1	8.06e-06
AP4	8	16	V$AP4_Q6_01	AP4	1.92e-05
AP4	30	38	V$AP4_Q6_01	AP4	1.92e-05
AP4	9	21	V$AP4_Q6_02	AP4	2.3e-05
AP4	31	43	V$AP4_Q6_02	AP4	2.3e-05
AP4	8	15	V$HEB_Q6	HEB	3.18e-05
AP4	30	37	V$HEB_Q6	HEB	3.18e-05
AP4	6	16	M3674_0.90$TCF12	TCF12	3.48e-05
AP4	28	38	M3674_0.90$TCF12	TCF12	3.48e-05
AP4	8	17	V$TFAP4_02	TFAP4	3.99e-05
AP4	30	39	V$TFAP4_02	TFAP4	3.99e-05
AP4	8	17	V$MSC_01	MSC	4.66e-05
AP4	30	39	V$MSC_01	MSC	4.66e-05
AP4	6	18	V$ZBTB18_01	ZBTB18	5.59e-05
AP4	28	40	V$ZBTB18_01	ZBTB18	5.59e-05
AP4	7	18	M1772_0.90$NHLH1	NHLH1	5.65e-05
AP4	29	40	M1772_0.90$NHLH1	NHLH1	5.65e-05
AP4	8	17	V$FIGLA_01	FIGLA	6.79e-05
AP4	30	39	V$FIGLA_01	FIGLA	6.79e-05
AP4	6	19	V$TCF21_01	TCF21	7.15e-05
AP4	28	41	V$TCF21_01	TCF21	7.15e-05
AP4	30	50	M3656_0.90$ETS1	ETS1	7.99e-05
AP4	9	16	M3708_0.90$TCF12	TCF12	8.05e-05
AP4	31	38	M3708_0.90$TCF12	TCF12	8.05e-05
AP4	9	17	M0174_0.90$Tcfap4	TCFAP4	8.18e-05
AP4	31	39	M0174_0.90$Tcfap4	TCFAP4	8.18e-05
AP4	8	17	M0176_0.90$Ascl2	ASCL2	8.58e-05
AP4	30	39	M0176_0.90$Ascl2	ASCL2	8.58e-05
AP4	4	21	V$MYOD_Q6_01	MYOD	8.76e-05
AP4	26	43	V$MYOD_Q6_01	MYOD	8.76e-05
AP4	8	17	V$ASCL2_05	ASCL2	9.14e-05
AP4	30	39	V$ASCL2_05	ASCL2	9.14e-05
AP4	8	16	M0212_0.90$Tcf21	TCF21	9.54e-05
AP4	30	38	M0212_0.90$Tcf21	TCF21	9.54e-05
AP4	2	23	V$HEN1_02	HEN1	9.74e-05
AP4	24	45	V$HEN1_02	HEN1	9.74e-05
AP4	15	32	V$IRF7_01	IRF7	0.000103
AP4	17	31	V$PRDM1_02	PRDM1	0.000105
AP4	8	15	V$MYOGENIN_Q6	MYOGENIN	0.000112
AP4	30	37	V$MYOGENIN_Q6	MYOGENIN	0.000112
AP4	8	17	M4574_0.90$FIGLA	FIGLA	0.000131
AP4	30	39	M4574_0.90$FIGLA	FIGLA	0.000131
AP4	16	31	V$BLIMP1_Q6	BLIMP1	0.000137
AP4	7	19	V$E2A_Q6_01	E2A	0.00014
AP4	29	41	V$E2A_Q6_01	E2A	0.00014
AP4	35	49	M3679_0.90$ZNF143	ZNF143	0.000151
AP4	12	28	M5114_0.90$ZNF282	ZNF282	0.000151
AP4	8	17	V$NHLH1_02	NHLH1	0.000167
AP4	30	39	V$NHLH1_02	NHLH1	0.000167
AP4	10	15	V$MYOGENIN_Q6_01	MYOGENIN	0.000195
AP4	32	37	V$MYOGENIN_Q6_01	MYOGENIN	0.000195
AP4	10	15	V$NEUROD_01	NEUROD	0.000195
AP4	32	37	V$NEUROD_01	NEUROD	0.000195
AP4	19	28	M1186_0.90$Irf2	IRF2	0.0002
AP4	5	21	V$TCFE2A_03	TCFE2A	0.0002
AP4	27	43	V$TCFE2A_03	TCFE2A	0.0002
AP4	8	17	V$TCF3_06	TCF3	0.000204
AP4	30	39	V$TCF3_06	TCF3	0.000204
AP4	8	16	M0201_0.90$Figla	FIGLA	0.000207
AP4	30	38	M0201_0.90$Figla	FIGLA	0.000207
AP4	8	17	M0214_0.90$Nhlh2	NHLH2	0.000209
AP4	30	39	M0214_0.90$Nhlh2	NHLH2	0.000209
AP4	8	17	M4780_0.90$MSC	MSC	0.000219
AP4	30	39	M4780_0.90$MSC	MSC	0.000219
AP4	2	23	V$HEN1_01	HEN1	0.000221
AP4	24	45	V$HEN1_01	HEN1	0.000221
AP4	8	18	V$E12_Q6	E12	0.000224
AP4	30	40	V$E12_Q6	E12	0.000224
AP4	17	22	V$TEF1_Q6	TEF1	0.000237
AP4	39	44	V$TEF1_Q6	TEF1	0.000237
AP4	5	20	V$E47_02	E47	0.00024
AP4	27	42	V$E47_02	E47	0.00024
AP4	17	31	M3740_0.90$PRDM1	PRDM1	0.000243
AP4	8	17	M4795_0.90$MYF6	MYF6	0.00025
AP4	30	39	M4795_0.90$MYF6	MYF6	0.00025
AP4	8	17	V$MYF6_05	MYF6	0.00025
AP4	30	39	V$MYF6_05	MYF6	0.00025
AP4	35	49	V$OCT4_01	OCT4	0.000254
AP4	16	29	V$BLIMP1_Q6_01	BLIMP1	0.000256
AP4	9	18	M0183_0.90$Tcf3	TCF3	0.00026
AP4	31	40	M0183_0.90$Tcf3	TCF3	0.00026
AP4	18	29	M1774_0.90$IRF1	IRF1	0.000261
AP4	8	17	V$MESP1_01	MESP1	0.000261
AP4	30	39	V$MESP1_01	MESP1	0.000261
AP4	10	18	V$MYOD_Q6_02	MYOD	0.000264
AP4	32	40	V$MYOD_Q6_02	MYOD	0.000264
AP4	16	29	V$IRF7_03	IRF7	0.000269
AP4	10	16	V$HTF4_Q2	HTF4	0.000283
AP4	32	38	V$HTF4_Q2	HTF4	0.000283
AP4	8	17	V$TAL1_Q6	TAL1	0.0003
AP4	30	39	V$TAL1_Q6	TAL1	0.0003
AP4	9	18	V$MATH1_Q2	MATH1	0.000304
AP4	31	40	V$MATH1_Q2	MATH1	0.000304
AP4	5	20	V$TAL1ALPHAE47_01	TAL1ALPHAE47	0.000307
AP4	27	42	V$TAL1ALPHAE47_01	TAL1ALPHAE47	0.000307
AP4	8	17	M4771_0.90$MESP1	MESP1	0.000322
AP4	30	39	M4771_0.90$MESP1	MESP1	0.000322
AP4	10	17	V$E2A_Q6	E2A	0.000329
AP4	32	39	V$E2A_Q6	E2A	0.000329
AP4	29	46	V$TP63_01	TP63	0.000333
AP4	10	16	V$MRF4_Q3	MRF4	0.000336
AP4	32	38	V$MRF4_Q3	MRF4	0.000336
AP4	17	30	M1849_0.90$STAT1	STAT1	0.000344
AP4	10	18	V$HEN2_Q2	HEN2	0.000351
AP4	32	40	V$HEN2_Q2	HEN2	0.000351
AP4	2	12	V$CP2_01	CP2	0.000366
AP4	24	34	V$CP2_01	CP2	0.000366
AP4	7	18	V$LMO2COM_01	LMO2COM	0.000373
AP4	29	40	V$LMO2COM_01	LMO2COM	0.000373
AP4	8	17	M0193_0.90$Msc	MSC	0.000385
AP4	30	39	M0193_0.90$Msc	MSC	0.000385
AP4	9	16	M0184_0.90$Tcf3	TCF3	0.0004
AP4	31	38	M0184_0.90$Tcf3	TCF3	0.0004
AP4	12	24	V$CEBP_01	CEBP	0.000402
AP4	9	17	M0182_0.90$Tcf3	TCF3	0.000407
AP4	31	39	M0182_0.90$Tcf3	TCF3	0.000407
AP4	7	18	V$NEUROD_02	NEUROD	0.000412
AP4	29	40	V$NEUROD_02	NEUROD	0.000412
AP4	8	17	M4715_0.90$ID4	ID4	0.000416
AP4	30	39	M4715_0.90$ID4	ID4	0.000416
AP4	13	31	M5111_0.90$ZNF232	ZNF232	0.000416
AP4	13	31	V$ZNF232_01	ZNF232	0.000416
AP4	17	34	M1775_0.90$IRF2	IRF2	0.000444
AP4	8	16	M0205_0.90$Tcf12	TCF12	0.000458
AP4	30	38	M0205_0.90$Tcf12	TCF12	0.000458
AP4	5	21	V$ASCL2_03	ASCL2	0.000462
AP4	27	43	V$ASCL2_03	ASCL2	0.000462
AP4	8	16	M0217_0.90$Tcf4	TCF4	0.000478
AP4	30	38	M0217_0.90$Tcf4	TCF4	0.000478
AP4	15	34	V$NANOG_02	NANOG	0.000486
AP4	17	29	V$IRF2_01	IRF2	0.000498
AR	1	22	M1729_0.90$Ar	AR	9.44e-12
AR	24	45	M1729_0.90$Ar	AR	9.44e-12
AR	5	19	V$AR_01	AR	7.85e-10
AR	28	42	V$AR_01	AR	7.85e-10
AR	5	19	V$AR_04	AR	1.57e-09
AR	28	42	V$AR_04	AR	1.57e-09
AR	5	20	V$GRE_C	GRE	5.22e-08
AR	28	43	V$GRE_C	GRE	5.22e-08
AR	4	20	V$AR_09	AR	1.55e-07
AR	27	43	V$AR_09	AR	1.55e-07
AR	4	20	V$AR_08	AR	4.46e-07
AR	27	43	V$AR_08	AR	4.46e-07
AR	4	20	V$NR3C1_03	NR3C1	1.01e-06
AR	27	43	V$NR3C1_03	NR3C1	1.01e-06
AR	6	20	V$AR_Q6_01	AR	1.02e-06
AR	29	43	V$AR_Q6_01	AR	1.02e-06
AR	6	19	M3623_0.90$NR3C1	NR3C1	1.23e-06
AR	29	42	M3623_0.90$NR3C1	NR3C1	1.23e-06
AR	4	20	V$NR3C2_01	NR3C2	1.32e-06
AR	27	43	V$NR3C2_01	NR3C2	1.32e-06
AR	3	23	M3635_0.90$NR3C1	NR3C1	4.69e-06
AR	26	46	M3635_0.90$NR3C1	NR3C1	4.69e-06
AR	9	19	V$PR_Q6	PR	1.72e-05
AR	32	42	V$PR_Q6	PR	1.72e-05
AR	22	31	V$CP2_Q6	CP2	2.38e-05
AR	5	19	V$AR_Q2	AR	2.86e-05
AR	28	42	V$AR_Q2	AR	2.86e-05
AR	3	21	V$GR_Q6	GR	3.4e-05
AR	26	44	V$GR_Q6	GR	3.4e-05
AR	23	32	M1464_0.90$Smad3	SMAD3	3.67e-05
AR	12	21	M1368_0.90$Ar	AR	6.6e-05
AR	35	44	M1368_0.90$Ar	AR	6.6e-05
AR	9	21	V$GR_Q6_02	GR	7.26e-05
AR	32	44	V$GR_Q6_02	GR	7.26e-05
AR	9	18	V$TBX5_02	TBX5	7.9e-05
AR	32	41	V$TBX5_02	TBX5	7.9e-05
AR	9	17	V$KLF3_Q3	KLF3	0.000105
AR	32	40	V$KLF3_Q3	KLF3	0.000105
AR	23	29	V$SMAD4_Q6_01	SMAD4	0.000107
AR	9	19	M5264_0.90$Gli3	GLI3	0.000135
AR	32	42	M5264_0.90$Gli3	GLI3	0.000135
AR	9	19	V$GLI3_01	GLI3	0.000203
AR	32	42	V$GLI3_01	GLI3	0.000203
AR	5	19	M5125_0.90$ZSCAN4	ZSCAN4	0.000203
AR	28	42	M5125_0.90$ZSCAN4	ZSCAN4	0.000203
AR	18	33	V$HAND1E47_01	HAND1E47	0.000228
AR	10	18	V$ZIC3_01	ZIC3	0.000232
AR	33	41	V$ZIC3_01	ZIC3	0.000232
AR	14	25	V$MEF2_Q6_01	MEF2	0.000286
AR	15	30	V$SOX2_Q6	SOX2	0.000287
AR	10	18	V$ZIC2_01	ZIC2	0.000344
AR	33	41	V$ZIC2_01	ZIC2	0.000344
AR	15	36	V$SOX7_04	SOX7	0.000375
AR	20	33	M4506_0.90$E2F7	E2F7	0.000385
AR	3	20	M1961_0.90$ESR2	ESR2	0.00045
AR	26	43	M1961_0.90$ESR2	ESR2	0.00045
ARNT1	1	9	V$AHRHIF_Q6	AHRHIF	2.23e-06
ARNT1	10	18	V$AHRHIF_Q6	AHRHIF	2.23e-06
ARNT1	19	27	V$AHRHIF_Q6	AHRHIF	2.23e-06
ARNT1	28	36	V$AHRHIF_Q6	AHRHIF	2.23e-06
ARNT1	37	45	V$AHRHIF_Q6	AHRHIF	2.23e-06
ARNT1	8	19	V$HIF1_Q5	HIF1	4.1e-05
ARNT1	17	28	V$HIF1_Q5	HIF1	4.1e-05
ARNT1	26	37	V$HIF1_Q5	HIF1	4.1e-05
ARNT1	8	18	V$AHR_Q5	AHR	4.27e-05
ARNT1	17	27	V$AHR_Q5	AHR	4.27e-05
ARNT1	26	36	V$AHR_Q5	AHR	4.27e-05
ARNT1	35	45	V$AHR_Q5	AHR	4.27e-05
ARNT1	4	22	V$AHRARNT_02	AHRARNT	4.41e-05
ARNT1	13	31	V$AHRARNT_02	AHRARNT	4.41e-05
ARNT1	22	40	V$AHRARNT_02	AHRARNT	4.41e-05
ARNT1	2	22	V$R_01	R	5.22e-05
ARNT1	11	31	V$R_01	R	5.22e-05
ARNT1	20	40	V$R_01	R	5.22e-05
ARNT1	5	22	V$LXR_Q3	LXR	6.49e-05
ARNT1	14	31	V$LXR_Q3	LXR	6.49e-05
ARNT1	23	40	V$LXR_Q3	LXR	6.49e-05
ARNT1	7	20	V$HIF1_Q3	HIF1	8.79e-05
ARNT1	16	29	V$HIF1_Q3	HIF1	8.79e-05
ARNT1	25	38	V$HIF1_Q3	HIF1	8.79e-05
ARNT1	4	21	V$HIC1_03	HIC1	9.83e-05
ARNT1	13	30	V$HIC1_03	HIC1	9.83e-05
ARNT1	22	39	V$HIC1_03	HIC1	9.83e-05
ARNT1	9	16	V$HIF1AARNT_01	HIF1AARNT	0.000173
ARNT1	18	25	V$HIF1AARNT_01	HIF1AARNT	0.000173
ARNT1	27	34	V$HIF1AARNT_01	HIF1AARNT	0.000173
ARNT1	36	43	V$HIF1AARNT_01	HIF1AARNT	0.000173
ARNT1	8	27	M3811_0.90$EGR1	EGR1	0.000194
ARNT1	17	36	M3811_0.90$EGR1	EGR1	0.000194
ARNT1	26	45	M3811_0.90$EGR1	EGR1	0.000194
ARNT1	9	18	V$HIF2A_01	HIF2A	0.000303
ARNT1	18	27	V$HIF2A_01	HIF2A	0.000303
ARNT1	27	36	V$HIF2A_01	HIF2A	0.000303
ARNT1	36	45	V$HIF2A_01	HIF2A	0.000303
ARNT1	3	18	V$CACCCBINDINGFACTOR_Q6	CACCCBINDINGFACTOR	0.000326
ARNT1	12	27	V$CACCCBINDINGFACTOR_Q6	CACCCBINDINGFACTOR	0.000326
ARNT1	21	36	V$CACCCBINDINGFACTOR_Q6	CACCCBINDINGFACTOR	0.000326
ARNT1	30	45	V$CACCCBINDINGFACTOR_Q6	CACCCBINDINGFACTOR	0.000326
ARNT1	1	11	M0404_0.90$Zfp3	ZFP3	0.000348
ARNT1	10	20	M0404_0.90$Zfp3	ZFP3	0.000348
ARNT1	19	29	M0404_0.90$Zfp3	ZFP3	0.000348
ARNT1	28	38	M0404_0.90$Zfp3	ZFP3	0.000348
ARNT1	5	11	V$AML1_Q4	AML1	0.000367
ARNT1	14	20	V$AML1_Q4	AML1	0.000367
ARNT1	23	29	V$AML1_Q4	AML1	0.000367
ARNT1	32	38	V$AML1_Q4	AML1	0.000367
ARNT1	7	26	M3654_0.90$EGR1	EGR1	0.000388
ARNT1	16	35	M3654_0.90$EGR1	EGR1	0.000388
ARNT1	25	44	M3654_0.90$EGR1	EGR1	0.000388
ARNT1	7	18	M4650_0.90$HES7	HES7	0.000422
ARNT1	16	27	M4650_0.90$HES7	HES7	0.000422
ARNT1	25	36	M4650_0.90$HES7	HES7	0.000422
ARNT1	34	45	M4650_0.90$HES7	HES7	0.000422
ARNT1	7	18	V$HES7_01	HES7	0.000422
ARNT1	16	27	V$HES7_01	HES7	0.000422
ARNT1	25	36	V$HES7_01	HES7	0.000422
ARNT1	34	45	V$HES7_01	HES7	0.000422
ARNT1	5	10	V$AML1_01	AML1	0.000432
ARNT1	14	19	V$AML1_01	AML1	0.000432
ARNT1	23	28	V$AML1_01	AML1	0.000432
ARNT1	32	37	V$AML1_01	AML1	0.000432
ARNT1	5	10	V$AML1_Q5	AML1	0.000432
ARNT1	14	19	V$AML1_Q5	AML1	0.000432
ARNT1	23	28	V$AML1_Q5	AML1	0.000432
ARNT1	32	37	V$AML1_Q5	AML1	0.000432
ARNT1	2	9	V$ZF5_01	ZF5	0.00045
ARNT1	11	18	V$ZF5_01	ZF5	0.00045
ARNT1	20	27	V$ZF5_01	ZF5	0.00045
ARNT1	29	36	V$ZF5_01	ZF5	0.00045
ARNT1	38	45	V$ZF5_01	ZF5	0.00045
BCATENIN	45	61	V$LEF1_04	LEF1	2.79e-07
BCATENIN	1	12	V$TCF7L1_01	TCF7L1	3.87e-07
BCATENIN	16	27	V$TCF7L1_01	TCF7L1	3.87e-07
BCATENIN	60	76	V$LEF1_04	LEF1	4.04e-07
BCATENIN	1	12	V$TCF7_05	TCF7	5.72e-07
BCATENIN	16	27	V$TCF7_05	TCF7	5.72e-07
BCATENIN	40	49	M0372_0.90$Plagl1	PLAGL1	7.52e-07
BCATENIN	49	59	V$LEF1TCF1_Q4	LEF1TCF1	8.57e-07
BCATENIN	64	74	V$LEF1TCF1_Q4	LEF1TCF1	8.57e-07
BCATENIN	79	89	V$LEF1TCF1_Q4	LEF1TCF1	8.57e-07
BCATENIN	75	91	V$LEF1_04	LEF1	9.24e-07
BCATENIN	3	12	M1478_0.90$Lef1	LEF1	1.11e-06
BCATENIN	18	27	M1478_0.90$Lef1	LEF1	1.11e-06
BCATENIN	3	12	M1476_0.90$Tcf7l2	TCF7L2	1.11e-06
BCATENIN	18	27	M1476_0.90$Tcf7l2	TCF7L2	1.11e-06
BCATENIN	1	15	V$LEF1_05	LEF1	1.16e-06
BCATENIN	16	30	V$LEF1_05	LEF1	1.16e-06
BCATENIN	42	50	V$LRF_Q2	LRF	1.5e-06
BCATENIN	4	13	V$LEF1_Q2_01	LEF1	1.82e-06
BCATENIN	19	28	V$LEF1_Q2_01	LEF1	1.82e-06
BCATENIN	41	50	M0381_0.90$Zfp711	ZFP711	3.51e-06
BCATENIN	15	31	V$TCF3_04	TCF3	3.62e-06
BCATENIN	15	31	V$TCF7_03	TCF7	4.33e-06
BCATENIN	39	54	V$PLAGL1_03	PLAGL1	7.24e-06
BCATENIN	49	57	V$TCF4_01	TCF4	8.06e-06
BCATENIN	64	72	V$TCF4_01	TCF4	8.06e-06
BCATENIN	79	87	V$TCF4_01	TCF4	8.06e-06
BCATENIN	88	95	M0897_0.90$Hnf1a	HNF1A	1.47e-05
BCATENIN	31	42	V$TCF7L1_01	TCF7L1	1.66e-05
BCATENIN	4	11	M1489_0.90$Tcf7l1	TCF7L1	1.79e-05
BCATENIN	19	26	M1489_0.90$Tcf7l1	TCF7L1	1.79e-05
BCATENIN	5	14	V$TCF4_Q5_01	TCF4	1.82e-05
BCATENIN	20	29	V$TCF4_Q5_01	TCF4	1.82e-05
BCATENIN	35	44	V$TCF4_Q5_01	TCF4	1.82e-05
BCATENIN	37	52	V$PLAGL1_03	PLAGL1	1.85e-05
BCATENIN	55	74	V$RXRPXR_Q2	RXRPXR	1.85e-05
BCATENIN	70	89	V$RXRPXR_Q2	RXRPXR	1.85e-05
BCATENIN	31	42	V$TCF7_05	TCF7	1.94e-05
BCATENIN	2	31	M5280_0.90$Bcl6	BCL6	2.28e-05
BCATENIN	38	53	V$PLAGL1_03	PLAGL1	2.44e-05
BCATENIN	34	44	V$SOX9_Q4	SOX9	2.66e-05
BCATENIN	2	10	M1470_0.90$Tcf7	TCF7	2.67e-05
BCATENIN	17	25	M1470_0.90$Tcf7	TCF7	2.67e-05
BCATENIN	40	56	V$ZFP281_05	ZFP281	2.67e-05
BCATENIN	4	14	V$SOX9_Q4	SOX9	2.79e-05
BCATENIN	19	29	V$SOX9_Q4	SOX9	2.79e-05
BCATENIN	3	14	V$GATA4_Q3	GATA4	2.9e-05
BCATENIN	18	29	V$GATA4_Q3	GATA4	2.9e-05
BCATENIN	33	42	M1476_0.90$Tcf7l2	TCF7L2	2.9e-05
BCATENIN	33	42	M1478_0.90$Lef1	LEF1	3.17e-05
BCATENIN	49	56	V$TCF4_Q5	TCF4	3.58e-05
BCATENIN	64	71	V$TCF4_Q5	TCF4	3.58e-05
BCATENIN	79	86	V$TCF4_Q5	TCF4	3.58e-05
BCATENIN	31	45	V$LEF1_05	LEF1	3.79e-05
BCATENIN	46	59	V$EAR2_Q2	EAR2	4.19e-05
BCATENIN	61	74	V$EAR2_Q2	EAR2	4.19e-05
BCATENIN	76	89	V$EAR2_Q2	EAR2	4.19e-05
BCATENIN	42	56	V$ZBTB7B_03	ZBTB7B	4.81e-05
BCATENIN	1	18	V$RARA_06	RARA	4.83e-05
BCATENIN	16	33	V$RARA_06	RARA	4.83e-05
BCATENIN	42	60	V$GR_Q6	GR	4.98e-05
BCATENIN	34	43	V$LEF1_Q2_01	LEF1	4.99e-05
BCATENIN	79	91	V$TCF3_01	TCF3	5.1e-05
BCATENIN	39	48	M0372_0.90$Plagl1	PLAGL1	5.39e-05
BCATENIN	6	12	V$LEF1_Q5	LEF1	6.51e-05
BCATENIN	21	27	V$LEF1_Q5	LEF1	6.51e-05
BCATENIN	36	42	V$LEF1_Q5	LEF1	6.51e-05
BCATENIN	6	12	V$LEF1_Q5_01	LEF1	6.51e-05
BCATENIN	21	27	V$LEF1_Q5_01	LEF1	6.51e-05
BCATENIN	36	42	V$LEF1_Q5_01	LEF1	6.51e-05
BCATENIN	12	22	M1828_0.90$Spz1	SPZ1	6.52e-05
BCATENIN	88	96	M0898_0.90$Hnf1a	HNF1A	6.82e-05
BCATENIN	2	18	V$RARG_03	RARG	7.78e-05
BCATENIN	17	33	V$RARG_03	RARG	7.78e-05
BCATENIN	13	27	V$COUPTF2_Q6	COUPTF2	8.02e-05
BCATENIN	30	46	V$TCF3_04	TCF3	8.31e-05
BCATENIN	30	46	V$TCF7_03	TCF7	8.57e-05
BCATENIN	27	41	V$TCF3_05	TCF3	0.000102
BCATENIN	8	18	M0371_0.90$Glis2	GLIS2	0.000104
BCATENIN	23	33	M0371_0.90$Glis2	GLIS2	0.000104
BCATENIN	26	49	V$GFI1_01	GFI1	0.000106
BCATENIN	38	47	M0384_0.90$Zbtb7b	ZBTB7B	0.000106
BCATENIN	41	51	M1823_0.90$NFKB1	NFKB1	0.000112
BCATENIN	37	51	V$E2F3_03	E2F3	0.00012
BCATENIN	25	35	V$TBP_Q6_01	TBP	0.000128
BCATENIN	38	47	M0382_0.90$Zfp202	ZFP202	0.00013
BCATENIN	36	48	V$MAZR_01	MAZR	0.000132
BCATENIN	27	37	M1828_0.90$Spz1	SPZ1	0.000142
BCATENIN	33	44	V$GATA4_Q3	GATA4	0.000152
BCATENIN	50	56	V$SOX_01	SOX	0.000159
BCATENIN	65	71	V$SOX_01	SOX	0.000159
BCATENIN	80	86	V$SOX_01	SOX	0.000159
BCATENIN	40	50	M1823_0.90$NFKB1	NFKB1	0.000161
BCATENIN	3	19	V$GCM1_04	GCM1	0.000162
BCATENIN	14	28	V$FOXA2_02	FOXA2	0.000166
BCATENIN	17	46	M5280_0.90$Bcl6	BCL6	0.000168
BCATENIN	49	61	V$TCF3_01	TCF3	0.00017
BCATENIN	64	76	V$TCF3_01	TCF3	0.00017
BCATENIN	27	42	V$PLAG1_01	PLAG1	0.000171
BCATENIN	1	14	V$SOX9_B1	SOX9	0.000175
BCATENIN	16	29	V$SOX9_B1	SOX9	0.000175
BCATENIN	40	59	V$RXRPXR_Q2	RXRPXR	0.000176
BCATENIN	48	70	V$COUPTF_Q6	COUPTF	0.00018
BCATENIN	63	85	V$COUPTF_Q6	COUPTF	0.00018
BCATENIN	3	32	M5282_0.90$Rela	RELA	0.000184
BCATENIN	1	10	V$GATA3_03	GATA3	0.000186
BCATENIN	16	25	V$GATA3_03	GATA3	0.000186
BCATENIN	34	41	M1489_0.90$Tcf7l1	TCF7L1	0.000187
BCATENIN	22	38	V$PLAGL1_04	PLAGL1	0.000189
BCATENIN	12	26	M3771_0.90$RXRA	RXRA	0.000192
BCATENIN	15	31	V$SOX11_03	SOX11	0.000197
BCATENIN	14	34	V$PPARG_01	PPARG	0.000198
BCATENIN	39	51	V$NFKB1_02	NFKB1	0.000211
BCATENIN	56	68	V$REVERBALPHA_Q6	REVERBALPHA	0.000212
BCATENIN	71	83	V$REVERBALPHA_Q6	REVERBALPHA	0.000212
BCATENIN	7	13	V$SOX18_Q5	SOX18	0.000214
BCATENIN	22	28	V$SOX18_Q5	SOX18	0.000214
BCATENIN	37	43	V$SOX18_Q5	SOX18	0.000214
BCATENIN	2	15	V$NR2C2_01	NR2C2	0.000223
BCATENIN	17	30	V$NR2C2_01	NR2C2	0.000223
BCATENIN	40	52	V$NFKB1_02	NFKB1	0.000226
BCATENIN	32	42	V$BETACATENIN_Q3	BETACATENIN	0.000229
BCATENIN	38	48	M0371_0.90$Glis2	GLIS2	0.00023
BCATENIN	2	16	V$HNF4_01_B	HNF4	0.000232
BCATENIN	17	31	V$HNF4_01_B	HNF4	0.000232
BCATENIN	29	43	V$FOXA2_02	FOXA2	0.00024
BCATENIN	8	23	V$RARB_01	RARB	0.000241
BCATENIN	2	9	V$NR4A2_01	NR4A2	0.000242
BCATENIN	17	24	V$NR4A2_01	NR4A2	0.000242
BCATENIN	36	50	M3835_0.90$ZBTB7A	ZBTB7A	0.000249
BCATENIN	26	41	V$HNF4A_07	HNF4A	0.000252
BCATENIN	55	71	V$ZFP281_05	ZFP281	0.000263
BCATENIN	70	86	V$ZFP281_05	ZFP281	0.000263
BCATENIN	3	15	V$HNF4A_03	HNF4A	0.000264
BCATENIN	18	30	V$HNF4A_03	HNF4A	0.000264
BCATENIN	25	39	V$SZF11_01	SZF11	0.000272
BCATENIN	2	15	V$NR2F6_01	NR2F6	0.000277
BCATENIN	17	30	V$NR2F6_01	NR2F6	0.000277
BCATENIN	28	47	V$NANOG_02	NANOG	0.000282
BCATENIN	15	44	M5280_0.90$Bcl6	BCL6	0.000284
BCATENIN	6	11	V$LEF1_Q2	LEF1	0.000289
BCATENIN	21	26	V$LEF1_Q2	LEF1	0.000289
BCATENIN	36	41	V$LEF1_Q2	LEF1	0.000289
BCATENIN	50	55	V$TCF3_Q6	TCF3	0.000289
BCATENIN	65	70	V$TCF3_Q6	TCF3	0.000289
BCATENIN	80	85	V$TCF3_Q6	TCF3	0.000289
BCATENIN	22	34	M5255_0.90$Zfp652	ZFP652	0.000303
BCATENIN	22	34	V$ZFP652_01	ZFP652	0.000303
BCATENIN	18	34	V$RXRRAR_01	RXRRAR	0.000309
BCATENIN	5	12	V$SOX4_01	SOX4	0.000315
BCATENIN	20	27	V$SOX4_01	SOX4	0.000315
BCATENIN	35	42	V$SOX4_01	SOX4	0.000315
BCATENIN	36	48	V$BTEB3_Q5	BTEB3	0.000317
BCATENIN	13	23	V$EVI1_02	EVI1	0.000325
BCATENIN	27	43	V$HDX_01	HDX	0.000327
BCATENIN	29	42	V$PTF1BETA_Q6	PTF1BETA	0.000327
BCATENIN	2	13	V$SMAD1_01	SMAD1	0.000328
BCATENIN	17	28	V$SMAD1_01	SMAD1	0.000328
BCATENIN	6	18	V$MAZR_01	MAZR	0.000329
BCATENIN	21	33	V$MAZR_01	MAZR	0.000329
BCATENIN	31	44	V$SOX9_B1	SOX9	0.000332
BCATENIN	33	41	M0106_0.90$Arid3a	ARID3A	0.000334
BCATENIN	2	15	V$HNF4A_06	HNF4A	0.000343
BCATENIN	17	30	V$HNF4A_06	HNF4A	0.000343
BCATENIN	10	24	V$SZF11_01	SZF11	0.000345
BCATENIN	4	17	M4635_0.90$GLIS2	GLIS2	0.000353
BCATENIN	19	32	M4635_0.90$GLIS2	GLIS2	0.000353
BCATENIN	13	32	V$NANOG_02	NANOG	0.000354
BCATENIN	30	46	V$SOX11_03	SOX11	0.000356
BCATENIN	32	43	V$SMAD1_01	SMAD1	0.000366
BCATENIN	12	31	V$HNF4_Q6_04	HNF4	0.000367
BCATENIN	7	27	V$PPARG_01	PPARG	0.000367
BCATENIN	59	72	V$GLIS2_05	GLIS2	0.000373
BCATENIN	74	87	V$GLIS2_05	GLIS2	0.000373
BCATENIN	9	18	M0398_0.90$Zfp281	ZFP281	0.000374
BCATENIN	24	33	M0398_0.90$Zfp281	ZFP281	0.000374
BCATENIN	2	16	V$NR2F1_02	NR2F1	0.000381
BCATENIN	17	31	V$NR2F1_02	NR2F1	0.000381
BCATENIN	43	57	V$ZBTB7B_03	ZBTB7B	0.000387
BCATENIN	10	20	V$TBP_Q6_01	TBP	0.000393
BCATENIN	7	23	V$PLAGL1_04	PLAGL1	0.000394
BCATENIN	45	58	V$ROAZ_01	ROAZ	0.000404
BCATENIN	12	25	M1750_0.90$Mecom	MECOM	0.000415
BCATENIN	1	19	V$PPARA_02	PPARA	0.000416
BCATENIN	8	17	M0408_0.90$Zfp740	ZFP740	0.000421
BCATENIN	23	32	M0408_0.90$Zfp740	ZFP740	0.000421
BCATENIN	13	28	V$T3R_01	T3R	0.000427
BCATENIN	37	51	V$E2F2_03	E2F2	0.00043
BCATENIN	23	39	V$OBOX5_02	OBOX5	0.000438
BCATENIN	23	39	V$OBOX5_05	OBOX5	0.000438
BCATENIN	55	70	V$GLIS2_03	GLIS2	0.00044
BCATENIN	70	85	V$GLIS2_03	GLIS2	0.00044
BCATENIN	36	53	V$E2F3_04	E2F3	0.000445
BCATENIN	39	48	M0382_0.90$Zfp202	ZFP202	0.000446
BCATENIN	8	17	M0382_0.90$Zfp202	ZFP202	0.00045
BCATENIN	23	32	M0382_0.90$Zfp202	ZFP202	0.00045
BCATENIN	59	72	V$GLIS3_01	GLIS3	0.00046
BCATENIN	74	87	V$GLIS3_01	GLIS3	0.00046
BCATENIN	31	42	V$HNF6_Q6	HNF6	0.000462
BCATENIN	38	55	V$E2F3_04	E2F3	0.00049
BRACHURY_1	1	24	V$BRACH_01	BRACH	3.11e-14
BRACHURY_1	25	48	V$BRACH_01	BRACH	3.11e-14
BRACHURY_1	49	72	V$BRACH_01	BRACH	3.11e-14
BRACHURY_1	3	22	M5026_0.90$TBX19	TBX19	3.45e-11
BRACHURY_1	27	46	M5026_0.90$TBX19	TBX19	3.45e-11
BRACHURY_1	51	70	M5026_0.90$TBX19	TBX19	3.45e-11
BRACHURY_1	3	22	V$TBX19_01	TBX19	3.45e-11
BRACHURY_1	27	46	V$TBX19_01	TBX19	3.45e-11
BRACHURY_1	51	70	V$TBX19_01	TBX19	3.45e-11
BRACHURY_1	5	20	V$BRACH_02	BRACH	2.15e-10
BRACHURY_1	29	44	V$BRACH_02	BRACH	2.15e-10
BRACHURY_1	53	68	V$BRACH_02	BRACH	2.15e-10
BRACHURY_1	11	21	M1731_0.90$T	T	2.49e-07
BRACHURY_1	35	45	M1731_0.90$T	T	2.49e-07
BRACHURY_1	59	69	M1731_0.90$T	T	2.49e-07
BRACHURY_1	12	24	V$EOMES_05	EOMES	8.18e-07
BRACHURY_1	36	48	V$EOMES_05	EOMES	8.18e-07
BRACHURY_1	60	72	V$EOMES_05	EOMES	8.18e-07
BRACHURY_1	9	25	V$EOMES_03	EOMES	8.35e-07
BRACHURY_1	33	49	V$EOMES_03	EOMES	8.35e-07
BRACHURY_1	12	22	V$TBX2_02	TBX2	8.57e-07
BRACHURY_1	36	46	V$TBX2_02	TBX2	8.57e-07
BRACHURY_1	60	70	V$TBX2_02	TBX2	8.57e-07
BRACHURY_1	12	22	V$TBX20_01	TBX20	1.01e-06
BRACHURY_1	36	46	V$TBX20_01	TBX20	1.01e-06
BRACHURY_1	60	70	V$TBX20_01	TBX20	1.01e-06
BRACHURY_1	13	22	M1519_0.90$Eomes	EOMES	1.11e-06
BRACHURY_1	37	46	M1519_0.90$Eomes	EOMES	1.11e-06
BRACHURY_1	61	70	M1519_0.90$Eomes	EOMES	1.11e-06
BRACHURY_1	13	22	M5017_0.90$TBR1	TBR1	1.11e-06
BRACHURY_1	37	46	M5017_0.90$TBR1	TBR1	1.11e-06
BRACHURY_1	61	70	M5017_0.90$TBR1	TBR1	1.11e-06
BRACHURY_1	12	22	V$TBR1_01	TBR1	1.41e-06
BRACHURY_1	36	46	V$TBR1_01	TBR1	1.41e-06
BRACHURY_1	60	70	V$TBR1_01	TBR1	1.41e-06
BRACHURY_1	12	21	M1520_0.90$Tbr1	TBR1	2.02e-06
BRACHURY_1	36	45	M1520_0.90$Tbr1	TBR1	2.02e-06
BRACHURY_1	60	69	M1520_0.90$Tbr1	TBR1	2.02e-06
BRACHURY_1	2	21	V$TBX1_05	TBX1	2.7e-06
BRACHURY_1	26	45	V$TBX1_05	TBX1	2.7e-06
BRACHURY_1	50	69	V$TBX1_05	TBX1	2.7e-06
BRACHURY_1	12	21	M1518_0.90$Tbx20	TBX20	3.12e-06
BRACHURY_1	36	45	M1518_0.90$Tbx20	TBX20	3.12e-06
BRACHURY_1	60	69	M1518_0.90$Tbx20	TBX20	3.12e-06
BRACHURY_1	12	21	V$TBX21_02	TBX21	3.12e-06
BRACHURY_1	36	45	V$TBX21_02	TBX21	3.12e-06
BRACHURY_1	60	69	V$TBX21_02	TBX21	3.12e-06
BRACHURY_1	13	23	M1515_0.90$Tbx1	TBX1	3.48e-06
BRACHURY_1	37	47	M1515_0.90$Tbx1	TBX1	3.48e-06
BRACHURY_1	61	71	M1515_0.90$Tbx1	TBX1	3.48e-06
BRACHURY_1	13	21	V$TBR2_01	TBR2	4.03e-06
BRACHURY_1	37	45	V$TBR2_01	TBR2	4.03e-06
BRACHURY_1	61	69	V$TBR2_01	TBR2	4.03e-06
BRACHURY_1	13	31	V$TBX22_01	TBX22	4.15e-06
BRACHURY_1	37	55	V$TBX22_01	TBX22	4.15e-06
BRACHURY_1	13	22	V$TBX2_Q2	TBX2	4.42e-06
BRACHURY_1	37	46	V$TBX2_Q2	TBX2	4.42e-06
BRACHURY_1	61	70	V$TBX2_Q2	TBX2	4.42e-06
BRACHURY_1	13	31	V$TBX18_01	TBX18	5.01e-06
BRACHURY_1	37	55	V$TBX18_01	TBX18	5.01e-06
BRACHURY_1	12	21	M1513_0.90$Tbx2	TBX2	5.14e-06
BRACHURY_1	36	45	M1513_0.90$Tbx2	TBX2	5.14e-06
BRACHURY_1	60	69	M1513_0.90$Tbx2	TBX2	5.14e-06
BRACHURY_1	12	21	M1517_0.90$Tbx3	TBX3	1.03e-05
BRACHURY_1	36	45	M1517_0.90$Tbx3	TBX3	1.03e-05
BRACHURY_1	60	69	M1517_0.90$Tbx3	TBX3	1.03e-05
BRACHURY_1	13	20	M4772_0.90$MGA	MGA	1.47e-05
BRACHURY_1	37	44	M4772_0.90$MGA	MGA	1.47e-05
BRACHURY_1	61	68	M4772_0.90$MGA	MGA	1.47e-05
BRACHURY_1	13	20	V$MGA_01	MGA	1.47e-05
BRACHURY_1	37	44	V$MGA_01	MGA	1.47e-05
BRACHURY_1	61	68	V$MGA_01	MGA	1.47e-05
BRACHURY_1	13	20	V$TBX1_03	TBX1	1.47e-05
BRACHURY_1	37	44	V$TBX1_03	TBX1	1.47e-05
BRACHURY_1	61	68	V$TBX1_03	TBX1	1.47e-05
BRACHURY_1	13	20	V$TBX15_04	TBX15	1.47e-05
BRACHURY_1	37	44	V$TBX15_04	TBX15	1.47e-05
BRACHURY_1	61	68	V$TBX15_04	TBX15	1.47e-05
BRACHURY_1	13	20	M1514_0.90$Tbx4	TBX4	1.47e-05
BRACHURY_1	37	44	M1514_0.90$Tbx4	TBX4	1.47e-05
BRACHURY_1	61	68	M1514_0.90$Tbx4	TBX4	1.47e-05
BRACHURY_1	13	20	M5040_0.90$TBX4	TBX4	1.47e-05
BRACHURY_1	37	44	M5040_0.90$TBX4	TBX4	1.47e-05
BRACHURY_1	61	68	M5040_0.90$TBX4	TBX4	1.47e-05
BRACHURY_1	13	20	V$TBX4_01	TBX4	1.47e-05
BRACHURY_1	37	44	V$TBX4_01	TBX4	1.47e-05
BRACHURY_1	61	68	V$TBX4_01	TBX4	1.47e-05
BRACHURY_1	13	20	M1516_0.90$Tbx5	TBX5	1.47e-05
BRACHURY_1	37	44	M1516_0.90$Tbx5	TBX5	1.47e-05
BRACHURY_1	61	68	M1516_0.90$Tbx5	TBX5	1.47e-05
BRACHURY_1	13	20	V$TBX5_03	TBX5	1.47e-05
BRACHURY_1	37	44	V$TBX5_03	TBX5	1.47e-05
BRACHURY_1	61	68	V$TBX5_03	TBX5	1.47e-05
BRACHURY_1	11	22	V$TBX5_01	TBX5	1.54e-05
BRACHURY_1	35	46	V$TBX5_01	TBX5	1.54e-05
BRACHURY_1	59	70	V$TBX5_01	TBX5	1.54e-05
BRACHURY_1	13	31	V$TBX15_03	TBX15	2.39e-05
BRACHURY_1	37	55	V$TBX15_03	TBX15	2.39e-05
BRACHURY_1	13	31	V$TBX1_02	TBX1	3.5e-05
BRACHURY_1	37	55	V$TBX1_02	TBX1	3.5e-05
BRACHURY_1	4	23	V$TBX1_05	TBX1	5.94e-05
BRACHURY_1	28	47	V$TBX1_05	TBX1	5.94e-05
BRACHURY_1	52	71	V$TBX1_05	TBX1	5.94e-05
BRACHURY_1	4	13	V$TBX5_Q5	TBX5	7.48e-05
BRACHURY_1	28	37	V$TBX5_Q5	TBX5	7.48e-05
BRACHURY_1	52	61	V$TBX5_Q5	TBX5	7.48e-05
BRACHURY_1	13	31	V$TBX15_01	TBX15	8.42e-05
BRACHURY_1	37	55	V$TBX15_01	TBX15	8.42e-05
BRACHURY_1	20	36	M5050_0.90$TEAD3	TEAD3	9.59e-05
BRACHURY_1	44	60	M5050_0.90$TEAD3	TEAD3	9.59e-05
BRACHURY_1	20	36	V$TEAD3_01	TEAD3	9.59e-05
BRACHURY_1	44	60	V$TEAD3_01	TEAD3	9.59e-05
BRACHURY_1	13	28	V$TBX20_02	TBX20	0.000101
BRACHURY_1	37	52	V$TBX20_02	TBX20	0.000101
BRACHURY_1	11	26	V$BLIMP1_Q6	BLIMP1	0.000108
BRACHURY_1	35	50	V$BLIMP1_Q6	BLIMP1	0.000108
BRACHURY_1	11	20	V$TBX5_02	TBX5	0.00011
BRACHURY_1	35	44	V$TBX5_02	TBX5	0.00011
BRACHURY_1	59	68	V$TBX5_02	TBX5	0.00011
BRACHURY_1	2	14	V$PAX3_01	PAX3	0.000128
BRACHURY_1	26	38	V$PAX3_01	PAX3	0.000128
BRACHURY_1	50	62	V$PAX3_01	PAX3	0.000128
BRACHURY_1	18	31	V$SOX1_08	SOX1	0.000131
BRACHURY_1	42	55	V$SOX1_08	SOX1	0.000131
BRACHURY_1	18	31	V$SOX10_06	SOX10	0.000155
BRACHURY_1	42	55	V$SOX10_06	SOX10	0.000155
BRACHURY_1	13	21	M0999_0.90$Rhox8	RHOX8	0.000188
BRACHURY_1	37	45	M0999_0.90$Rhox8	RHOX8	0.000188
BRACHURY_1	61	69	M0999_0.90$Rhox8	RHOX8	0.000188
BRACHURY_1	13	28	M5027_0.90$TBX20	TBX20	0.000198
BRACHURY_1	37	52	M5027_0.90$TBX20	TBX20	0.000198
BRACHURY_1	20	36	V$TEAD1_04	TEAD1	0.000209
BRACHURY_1	44	60	V$TEAD1_04	TEAD1	0.000209
BRACHURY_1	5	15	V$DELTAEF1_01	DELTAEF1	0.000228
BRACHURY_1	29	39	V$DELTAEF1_01	DELTAEF1	0.000228
BRACHURY_1	53	63	V$DELTAEF1_01	DELTAEF1	0.000228
BRACHURY_1	19	31	V$SOX21_08	SOX21	0.000284
BRACHURY_1	43	55	V$SOX21_08	SOX21	0.000284
BRACHURY_1	13	32	V$TBX5_04	TBX5	0.00029
BRACHURY_1	37	56	V$TBX5_04	TBX5	0.00029
BRACHURY_1	11	19	V$KLF3_Q3	KLF3	0.000334
BRACHURY_1	35	43	V$KLF3_Q3	KLF3	0.000334
BRACHURY_1	59	67	V$KLF3_Q3	KLF3	0.000334
BRACHURY_1	6	22	M3746_0.90$ZNF274	ZNF274	0.000343
BRACHURY_1	30	46	M3746_0.90$ZNF274	ZNF274	0.000343
BRACHURY_1	54	70	M3746_0.90$ZNF274	ZNF274	0.000343
BRACHURY_1	24	34	V$PITX2_Q2	PITX2	0.000379
BRACHURY_1	48	58	V$PITX2_Q2	PITX2	0.000379
BRACHURY_1	6	15	V$TCF4_04	TCF4	0.000404
BRACHURY_1	30	39	V$TCF4_04	TCF4	0.000404
BRACHURY_1	54	63	V$TCF4_04	TCF4	0.000404
BRACHURY_1	15	34	V$MTF1_01	MTF1	0.000427
BRACHURY_1	39	58	V$MTF1_01	MTF1	0.000427
BRACHURY_1	5	19	M1830_0.90$Zfp423	ZFP423	0.000435
BRACHURY_1	29	43	M1830_0.90$Zfp423	ZFP423	0.000435
BRACHURY_1	53	67	M1830_0.90$Zfp423	ZFP423	0.000435
BRACHURY_1	7	20	V$ROAZ_01	ROAZ	0.000441
BRACHURY_1	31	44	V$ROAZ_01	ROAZ	0.000441
BRACHURY_1	55	68	V$ROAZ_01	ROAZ	0.000441
BRACHURY_1	24	46	V$TBX1_04	TBX1	0.000464
BRACHURY_1	48	70	V$TBX1_04	TBX1	0.000464
BRACHURY_1	13	30	V$MGA_02	MGA	0.000486
BRACHURY_1	37	54	V$MGA_02	MGA	0.000486
BRACHURY_1	19	28	M5052_0.90$TEAD4	TEAD4	0.000488
BRACHURY_1	43	52	M5052_0.90$TEAD4	TEAD4	0.000488
BRACHURY_1	19	28	V$TEAD4_01	TEAD4	0.000488
BRACHURY_1	43	52	V$TEAD4_01	TEAD4	0.000488
BRACHURY_1	8	22	M3682_0.90$PAX5	PAX5	0.000491
BRACHURY_1	32	46	M3682_0.90$PAX5	PAX5	0.000491
BRACHURY_1	56	70	M3682_0.90$PAX5	PAX5	0.000491
BRACHURY_1	13	32	V$TBX4_02	TBX4	0.000495
BRACHURY_1	37	56	V$TBX4_02	TBX4	0.000495
CMYC	30	39	M0218_0.90$Arntl	ARNTL	6.13e-07
CMYC	8	17	M0386_0.90$Zkscan1	ZKSCAN1	7.46e-07
CMYC	14	23	M0386_0.90$Zkscan1	ZKSCAN1	7.46e-07
CMYC	20	29	M0386_0.90$Zkscan1	ZKSCAN1	7.46e-07
CMYC	26	35	M0386_0.90$Zkscan1	ZKSCAN1	7.46e-07
CMYC	28	40	M3660_0.90$MAX	MAX	7.49e-07
CMYC	5	15	M3804_0.90$MYC	MYC	8.68e-07
CMYC	4	14	M3737_0.90$MAX	MAX	1.12e-06
CMYC	2	13	V$MAX_Q6	MAX	1.34e-06
CMYC	28	39	M0177_0.90$Arnt	ARNT	1.56e-06
CMYC	27	40	M3832_0.90$USF1	USF1	1.63e-06
CMYC	30	39	M0180_0.90$Mlx	MLX	1.97e-06
CMYC	5	15	M3753_0.90$MYC	MYC	2.07e-06
CMYC	4	14	M3840_0.90$MYC	MYC	2.46e-06
CMYC	30	39	M0206_0.90$Mitf	MITF	2.72e-06
CMYC	25	39	M3624_0.90$USF1	USF1	3.22e-06
CMYC	30	39	M0200_0.90$Tcfec	TCFEC	3.33e-06
CMYC	25	40	M3710_0.90$USF2	USF2	3.51e-06
CMYC	25	39	M3709_0.90$USF1	USF1	3.53e-06
CMYC	30	39	M3823_0.90$MAX	MAX	3.59e-06
CMYC	30	39	M0172_0.90$Tcfe3	TCFE3	3.83e-06
CMYC	26	40	M3675_0.90$USF1	USF1	4.26e-06
CMYC	27	39	M3774_0.90$USF2	USF2	4.3e-06
CMYC	28	40	M3791_0.90$MAX	MAX	4.61e-06
CMYC	25	39	M3676_0.90$USF2	USF2	4.63e-06
CMYC	30	38	M0202_0.90$Bhlhe40	BHLHE40	4.95e-06
CMYC	12	20	M0173_0.90$Mnt	MNT	4.95e-06
CMYC	18	26	M0173_0.90$Mnt	MNT	4.95e-06
CMYC	24	32	M0173_0.90$Mnt	MNT	4.95e-06
CMYC	27	39	M3833_0.90$USF2	USF2	5.52e-06
CMYC	31	39	M0179_0.90$Mlx	MLX	6.03e-06
CMYC	4	15	V$CMYC_01	CMYC	6.18e-06
CMYC	29	39	V$DEC1_Q2	DEC1	6.55e-06
CMYC	29	39	M3773_0.90$USF1	USF1	7.93e-06
CMYC	27	39	V$USF2_Q6_01	USF2	8.98e-06
CMYC	30	39	V$EBOX_Q6_01	EBOX	9.15e-06
CMYC	29	38	V$BHLHE41_01	BHLHE41	9.32e-06
CMYC	30	38	M0181_0.90$Hey2	HEY2	9.9e-06
CMYC	6	13	V$USF_C	USF	9.9e-06
CMYC	29	39	M3745_0.90$USF2	USF2	1.07e-05
CMYC	6	15	M0180_0.90$Mlx	MLX	1.09e-05
CMYC	30	37	M0203_0.90$Bhlhe40	BHLHE40	1.21e-05
CMYC	30	37	M0187_0.90$Id2	ID2	1.21e-05
CMYC	31	38	M0191_0.90$Tcfeb	TCFEB	1.21e-05
CMYC	29	38	V$BHLHE40_02	BHLHE40	1.25e-05
CMYC	27	40	V$STRA13_01	STRA13	1.26e-05
CMYC	10	21	V$CMYC_01	CMYC	1.27e-05
CMYC	16	27	V$CMYC_01	CMYC	1.27e-05
CMYC	22	33	V$CMYC_01	CMYC	1.27e-05
CMYC	30	40	M3841_0.90$MAX	MAX	1.3e-05
CMYC	29	38	V$BHLHE40_01	BHLHE40	1.34e-05
CMYC	5	14	V$HEY2_01	HEY2	1.42e-05
CMYC	6	15	M3822_0.90$MAX	MAX	1.57e-05
CMYC	3	16	V$MYCMAX_01	MYCMAX	1.59e-05
CMYC	2	17	V$ARNT_01	ARNT	1.63e-05
CMYC	2	12	M3738_0.90$MXI1	MXI1	1.65e-05
CMYC	12	21	M0180_0.90$Mlx	MLX	1.79e-05
CMYC	18	27	M0180_0.90$Mlx	MLX	1.79e-05
CMYC	24	33	M0180_0.90$Mlx	MLX	1.79e-05
CMYC	5	14	M4778_0.90$MNT	MNT	1.85e-05
CMYC	5	14	V$MNT_01	MNT	1.85e-05
CMYC	5	14	V$HEY1_01	HEY1	1.88e-05
CMYC	5	14	M0198_0.90$Clock	CLOCK	1.98e-05
CMYC	12	19	V$HIF1AARNT_01	HIF1AARNT	1.98e-05
CMYC	18	25	V$HIF1AARNT_01	HIF1AARNT	1.98e-05
CMYC	24	31	V$HIF1AARNT_01	HIF1AARNT	1.98e-05
CMYC	10	19	M3748_0.90$BHLHE40	BHLHE40	2.01e-05
CMYC	16	25	M3748_0.90$BHLHE40	BHLHE40	2.01e-05
CMYC	22	31	M3748_0.90$BHLHE40	BHLHE40	2.01e-05
CMYC	4	16	V$MYF5_Q6	MYF5	2.17e-05
CMYC	29	39	M0195_0.90$Usf1	USF1	2.17e-05
CMYC	12	19	M0203_0.90$Bhlhe40	BHLHE40	2.2e-05
CMYC	18	25	M0203_0.90$Bhlhe40	BHLHE40	2.2e-05
CMYC	24	31	M0203_0.90$Bhlhe40	BHLHE40	2.2e-05
CMYC	5	12	M3838_0.90$MYC	MYC	2.2e-05
CMYC	5	14	V$MYCMAX_B	MYCMAX	2.23e-05
CMYC	5	15	M3805_0.90$MYC	MYC	2.25e-05
CMYC	6	25	V$ARNT_02	ARNT	2.43e-05
CMYC	4	13	V$NMYC_Q3	NMYC	2.43e-05
CMYC	6	16	M3702_0.90$MAX	MAX	2.61e-05
CMYC	4	16	V$DEC_Q1	DEC	2.63e-05
CMYC	10	21	M0177_0.90$Arnt	ARNT	2.65e-05
CMYC	16	27	M0177_0.90$Arnt	ARNT	2.65e-05
CMYC	22	33	M0177_0.90$Arnt	ARNT	2.65e-05
CMYC	12	31	V$ARNT_02	ARNT	2.67e-05
CMYC	6	14	M0173_0.90$Mnt	MNT	2.85e-05
CMYC	29	38	M0223_0.90$Usf2	USF2	2.86e-05
CMYC	4	13	M1781_0.90$MAX	MAX	2.89e-05
CMYC	5	14	M0194_0.90$Npas2	NPAS2	2.99e-05
CMYC	29	40	V$TFEA_Q6	TFEA	3.13e-05
CMYC	7	15	M0179_0.90$Mlx	MLX	3.26e-05
CMYC	13	21	M0179_0.90$Mlx	MLX	3.26e-05
CMYC	19	27	M0179_0.90$Mlx	MLX	3.26e-05
CMYC	25	33	M0179_0.90$Mlx	MLX	3.26e-05
CMYC	29	38	M4434_0.90$ARNTL	ARNTL	3.52e-05
CMYC	29	38	V$ARNTL_01	ARNTL	3.52e-05
CMYC	10	22	V$DEC_Q1	DEC	3.92e-05
CMYC	16	28	V$DEC_Q1	DEC	3.92e-05
CMYC	22	34	V$DEC_Q1	DEC	3.92e-05
CMYC	29	38	M4776_0.90$MLX	MLX	3.97e-05
CMYC	29	38	V$MLX_01	MLX	3.97e-05
CMYC	4	15	V$NMYC_01	NMYC	4e-05
CMYC	10	19	V$DEC2_Q2	DEC2	4.01e-05
CMYC	16	25	V$DEC2_Q2	DEC2	4.01e-05
CMYC	22	31	V$DEC2_Q2	DEC2	4.01e-05
CMYC	29	38	V$TFE3_01	TFE3	4.21e-05
CMYC	30	40	M3702_0.90$MAX	MAX	4.28e-05
CMYC	5	14	M0213_0.90$Hes5	HES5	4.34e-05
CMYC	11	20	M4778_0.90$MNT	MNT	4.35e-05
CMYC	17	26	M4778_0.90$MNT	MNT	4.35e-05
CMYC	23	32	M4778_0.90$MNT	MNT	4.35e-05
CMYC	11	20	V$MNT_01	MNT	4.35e-05
CMYC	17	26	V$MNT_01	MNT	4.35e-05
CMYC	23	32	V$MNT_01	MNT	4.35e-05
CMYC	6	12	M1810_0.90$USF1	USF1	4.39e-05
CMYC	11	20	V$BHLHE41_01	BHLHE41	4.41e-05
CMYC	17	26	V$BHLHE41_01	BHLHE41	4.41e-05
CMYC	23	32	V$BHLHE41_01	BHLHE41	4.41e-05
CMYC	11	20	M0194_0.90$Npas2	NPAS2	4.43e-05
CMYC	17	26	M0194_0.90$Npas2	NPAS2	4.43e-05
CMYC	23	32	M0194_0.90$Npas2	NPAS2	4.43e-05
CMYC	12	21	M3822_0.90$MAX	MAX	4.45e-05
CMYC	18	27	M3822_0.90$MAX	MAX	4.45e-05
CMYC	24	33	M3822_0.90$MAX	MAX	4.45e-05
CMYC	29	38	V$BHLHE41_02	BHLHE41	4.48e-05
CMYC	11	20	M0196_0.90$Sohlh2	SOHLH2	4.57e-05
CMYC	17	26	M0196_0.90$Sohlh2	SOHLH2	4.57e-05
CMYC	23	32	M0196_0.90$Sohlh2	SOHLH2	4.57e-05
CMYC	9	22	V$MYCMAX_01	MYCMAX	4.58e-05
CMYC	15	28	V$MYCMAX_01	MYCMAX	4.58e-05
CMYC	21	34	V$MYCMAX_01	MYCMAX	4.58e-05
CMYC	5	14	V$MAX_08	MAX	4.71e-05
CMYC	5	14	M4653_0.90$HEY1	HEY1	5.03e-05
CMYC	5	14	M0189_0.90$Hes1	HES1	5.09e-05
CMYC	10	23	V$HIF1_Q3	HIF1	5.11e-05
CMYC	16	29	V$HIF1_Q3	HIF1	5.11e-05
CMYC	22	35	V$HIF1_Q3	HIF1	5.11e-05
CMYC	18	37	V$ARNT_02	ARNT	5.15e-05
CMYC	6	13	V$HIF1AARNT_01	HIF1AARNT	5.16e-05
CMYC	29	38	M0199_0.90$Tcfec	TCFEC	5.29e-05
CMYC	27	40	V$USF_01	USF	5.4e-05
CMYC	12	20	M0202_0.90$Bhlhe40	BHLHE40	5.56e-05
CMYC	18	26	M0202_0.90$Bhlhe40	BHLHE40	5.56e-05
CMYC	24	32	M0202_0.90$Bhlhe40	BHLHE40	5.56e-05
CMYC	4	13	M3748_0.90$BHLHE40	BHLHE40	5.62e-05
CMYC	29	38	V$MLXIPL_01	MLXIPL	5.66e-05
CMYC	11	20	V$BHLHE40_02	BHLHE40	5.74e-05
CMYC	17	26	V$BHLHE40_02	BHLHE40	5.74e-05
CMYC	23	32	V$BHLHE40_02	BHLHE40	5.74e-05
CMYC	11	20	V$BHLHE40_01	BHLHE40	5.99e-05
CMYC	17	26	V$BHLHE40_01	BHLHE40	5.99e-05
CMYC	23	32	V$BHLHE40_01	BHLHE40	5.99e-05
CMYC	11	20	M4653_0.90$HEY1	HEY1	6.04e-05
CMYC	17	26	M4653_0.90$HEY1	HEY1	6.04e-05
CMYC	23	32	M4653_0.90$HEY1	HEY1	6.04e-05
CMYC	11	20	V$HEY1_01	HEY1	6.04e-05
CMYC	17	26	V$HEY1_01	HEY1	6.04e-05
CMYC	23	32	V$HEY1_01	HEY1	6.04e-05
CMYC	28	37	M3748_0.90$BHLHE40	BHLHE40	6.06e-05
CMYC	12	20	M0181_0.90$Hey2	HEY2	6.07e-05
CMYC	18	26	M0181_0.90$Hey2	HEY2	6.07e-05
CMYC	24	32	M0181_0.90$Hey2	HEY2	6.07e-05
CMYC	30	37	M0209_0.90$Mlxip	MLXIP	6.07e-05
CMYC	10	19	M3727_0.90$MYC	MYC	6.19e-05
CMYC	16	25	M3727_0.90$MYC	MYC	6.19e-05
CMYC	22	31	M3727_0.90$MYC	MYC	6.19e-05
CMYC	29	38	M4778_0.90$MNT	MNT	6.26e-05
CMYC	29	38	V$MNT_01	MNT	6.26e-05
CMYC	6	15	M3823_0.90$MAX	MAX	6.37e-05
CMYC	4	15	V$CMYC_02	CMYC	6.52e-05
CMYC	5	14	M4654_0.90$HEY2	HEY2	6.52e-05
CMYC	6	14	M0219_0.90$Max	MAX	6.62e-05
CMYC	28	39	V$USF_Q6_01	USF	6.67e-05
CMYC	4	13	M3727_0.90$MYC	MYC	6.68e-05
CMYC	5	13	M0302_0.90$Creb3l2	CREB3L2	6.72e-05
CMYC	11	18	M3838_0.90$MYC	MYC	6.8e-05
CMYC	17	24	M3838_0.90$MYC	MYC	6.8e-05
CMYC	23	30	M3838_0.90$MYC	MYC	6.8e-05
CMYC	29	36	M3838_0.90$MYC	MYC	6.8e-05
CMYC	5	19	V$HIC1_02	HIC1	6.82e-05
CMYC	10	21	V$AREB6_03	AREB6	6.88e-05
CMYC	16	27	V$AREB6_03	AREB6	6.88e-05
CMYC	22	33	V$AREB6_03	AREB6	6.88e-05
CMYC	27	40	V$MYCMAX_01	MYCMAX	6.99e-05
CMYC	29	38	V$HEY1_01	HEY1	7.12e-05
CMYC	12	21	V$HIF2A_01	HIF2A	7.22e-05
CMYC	18	27	V$HIF2A_01	HIF2A	7.22e-05
CMYC	24	33	V$HIF2A_01	HIF2A	7.22e-05
CMYC	29	38	M4654_0.90$HEY2	HEY2	7.33e-05
CMYC	31	38	V$CMYC_Q6_01	CMYC	7.4e-05
CMYC	6	16	M3841_0.90$MAX	MAX	7.54e-05
CMYC	12	22	M3702_0.90$MAX	MAX	7.68e-05
CMYC	18	28	M3702_0.90$MAX	MAX	7.68e-05
CMYC	24	34	M3702_0.90$MAX	MAX	7.68e-05
CMYC	3	16	V$MAX_01	MAX	8.19e-05
CMYC	10	19	M0178_0.90$Arnt2	ARNT2	8.26e-05
CMYC	16	25	M0178_0.90$Arnt2	ARNT2	8.26e-05
CMYC	22	31	M0178_0.90$Arnt2	ARNT2	8.26e-05
CMYC	6	13	V$CLOCKBMAL_Q6	CLOCKBMAL	8.27e-05
CMYC	29	38	M1822_0.90$Mycn	MYCN	8.5e-05
CMYC	29	38	V$MYCN_01	MYCN	8.66e-05
CMYC	7	19	M0197_0.90$Hes2	HES2	8.7e-05
CMYC	13	25	M0197_0.90$Hes2	HES2	8.7e-05
CMYC	19	31	M0197_0.90$Hes2	HES2	8.7e-05
CMYC	29	38	V$TFEB_02	TFEB	8.75e-05
CMYC	7	13	V$MYC_Q2	MYC	8.78e-05
CMYC	13	19	V$MYC_Q2	MYC	8.78e-05
CMYC	19	25	V$MYC_Q2	MYC	8.78e-05
CMYC	25	31	V$MYC_Q2	MYC	8.78e-05
CMYC	11	20	M4654_0.90$HEY2	HEY2	8.9e-05
CMYC	17	26	M4654_0.90$HEY2	HEY2	8.9e-05
CMYC	23	32	M4654_0.90$HEY2	HEY2	8.9e-05
CMYC	30	38	M0173_0.90$Mnt	MNT	8.96e-05
CMYC	10	22	M3660_0.90$MAX	MAX	9.25e-05
CMYC	16	28	M3660_0.90$MAX	MAX	9.25e-05
CMYC	22	34	M3660_0.90$MAX	MAX	9.25e-05
CMYC	30	38	M0219_0.90$Max	MAX	9.83e-05
CMYC	5	15	M0195_0.90$Usf1	USF1	9.83e-05
CMYC	11	21	M3804_0.90$MYC	MYC	9.84e-05
CMYC	17	27	M3804_0.90$MYC	MYC	9.84e-05
CMYC	23	33	M3804_0.90$MYC	MYC	9.84e-05
CMYC	29	38	M4653_0.90$HEY1	HEY1	9.94e-05
CMYC	11	21	V$NRF1_Q6_01	NRF1	0.000101
CMYC	17	27	V$NRF1_Q6_01	NRF1	0.000101
CMYC	23	33	V$NRF1_Q6_01	NRF1	0.000101
CMYC	29	38	M0189_0.90$Hes1	HES1	0.000102
CMYC	27	40	V$MAX_01	MAX	0.000105
CMYC	2	18	V$SP4_05	SP4	0.000105
CMYC	5	14	M0199_0.90$Tcfec	TCFEC	0.000106
CMYC	12	19	M0187_0.90$Id2	ID2	0.000107
CMYC	18	25	M0187_0.90$Id2	ID2	0.000107
CMYC	24	31	M0187_0.90$Id2	ID2	0.000107
CMYC	12	19	V$USF_C	USF	0.000107
CMYC	18	25	V$USF_C	USF	0.000107
CMYC	24	31	V$USF_C	USF	0.000107
CMYC	29	38	M0210_0.90$Tcfl5	TCFL5	0.000109
CMYC	30	39	M3822_0.90$MAX	MAX	0.000111
CMYC	5	14	M4465_0.90$CLOCK	CLOCK	0.000112
CMYC	5	14	V$CLOCK_01	CLOCK	0.000112
CMYC	11	20	V$HEY2_01	HEY2	0.000112
CMYC	17	26	V$HEY2_01	HEY2	0.000112
CMYC	23	32	V$HEY2_01	HEY2	0.000112
CMYC	7	15	M0410_0.90$Zfp161	ZFP161	0.000115
CMYC	13	21	M0410_0.90$Zfp161	ZFP161	0.000115
CMYC	19	27	M0410_0.90$Zfp161	ZFP161	0.000115
CMYC	25	33	M0410_0.90$Zfp161	ZFP161	0.000115
CMYC	11	20	M0213_0.90$Hes5	HES5	0.000117
CMYC	17	26	M0213_0.90$Hes5	HES5	0.000117
CMYC	23	32	M0213_0.90$Hes5	HES5	0.000117
CMYC	29	38	V$USF1_02	USF1	0.000118
CMYC	11	20	M0198_0.90$Clock	CLOCK	0.000119
CMYC	17	26	M0198_0.90$Clock	CLOCK	0.000119
CMYC	23	32	M0198_0.90$Clock	CLOCK	0.000119
CMYC	12	19	M0209_0.90$Mlxip	MLXIP	0.000119
CMYC	18	25	M0209_0.90$Mlxip	MLXIP	0.000119
CMYC	24	31	M0209_0.90$Mlxip	MLXIP	0.000119
CMYC	8	18	M3738_0.90$MXI1	MXI1	0.000119
CMYC	14	24	M3738_0.90$MXI1	MXI1	0.000119
CMYC	20	30	M3738_0.90$MXI1	MXI1	0.000119
CMYC	26	36	M3738_0.90$MXI1	MXI1	0.000119
CMYC	10	21	V$NMYC_01	NMYC	0.000119
CMYC	16	27	V$NMYC_01	NMYC	0.000119
CMYC	22	33	V$NMYC_01	NMYC	0.000119
CMYC	5	14	M0210_0.90$Tcfl5	TCFL5	0.00012
CMYC	29	38	M5074_0.90$TFE3	TFE3	0.000121
CMYC	5	14	V$BHLHE40_01	BHLHE40	0.000127
CMYC	12	21	M0183_0.90$Tcf3	TCF3	0.000127
CMYC	18	27	M0183_0.90$Tcf3	TCF3	0.000127
CMYC	24	33	M0183_0.90$Tcf3	TCF3	0.000127
CMYC	11	20	M0210_0.90$Tcfl5	TCFL5	0.000128
CMYC	17	26	M0210_0.90$Tcfl5	TCFL5	0.000128
CMYC	23	32	M0210_0.90$Tcfl5	TCFL5	0.000128
CMYC	27	41	V$ERALPHA_Q6_02	ERALPHA	0.000129
CMYC	11	22	V$HIF1_Q5	HIF1	0.00013
CMYC	17	28	V$HIF1_Q5	HIF1	0.00013
CMYC	23	34	V$HIF1_Q5	HIF1	0.00013
CMYC	5	14	M0223_0.90$Usf2	USF2	0.000131
CMYC	12	21	M3823_0.90$MAX	MAX	0.000132
CMYC	18	27	M3823_0.90$MAX	MAX	0.000132
CMYC	24	33	M3823_0.90$MAX	MAX	0.000132
CMYC	7	13	V$MRF4_Q3	MRF4	0.000132
CMYC	13	19	V$MRF4_Q3	MRF4	0.000132
CMYC	19	25	V$MRF4_Q3	MRF4	0.000132
CMYC	25	31	V$MRF4_Q3	MRF4	0.000132
CMYC	12	20	M0219_0.90$Max	MAX	0.000133
CMYC	18	26	M0219_0.90$Max	MAX	0.000133
CMYC	24	32	M0219_0.90$Max	MAX	0.000133
CMYC	28	37	M3727_0.90$MYC	MYC	0.000133
CMYC	29	38	V$MAX_08	MAX	0.000135
CMYC	24	42	V$ER_Q6	ER	0.000136
CMYC	2	18	V$TCFE2A_03	TCFE2A	0.00014
CMYC	12	31	V$P53_01	P53	0.000141
CMYC	11	20	V$MAX_08	MAX	0.000143
CMYC	17	26	V$MAX_08	MAX	0.000143
CMYC	23	32	V$MAX_08	MAX	0.000143
CMYC	6	13	M0209_0.90$Mlxip	MLXIP	0.000144
CMYC	11	21	M3805_0.90$MYC	MYC	0.000144
CMYC	17	27	M3805_0.90$MYC	MYC	0.000144
CMYC	23	33	M3805_0.90$MYC	MYC	0.000144
CMYC	28	39	V$NMYC_01	NMYC	0.000145
CMYC	28	39	V$MYCMAX_02	MYCMAX	0.000146
CMYC	7	16	V$NRF1_Q6	NRF1	0.000146
CMYC	13	22	V$NRF1_Q6	NRF1	0.000146
CMYC	19	28	V$NRF1_Q6	NRF1	0.000146
CMYC	25	34	V$NRF1_Q6	NRF1	0.000146
CMYC	11	21	M3753_0.90$MYC	MYC	0.000147
CMYC	17	27	M3753_0.90$MYC	MYC	0.000147
CMYC	23	33	M3753_0.90$MYC	MYC	0.000147
CMYC	28	41	V$HIF1_Q3	HIF1	0.000148
CMYC	10	20	M3737_0.90$MAX	MAX	0.000148
CMYC	16	26	M3737_0.90$MAX	MAX	0.000148
CMYC	22	32	M3737_0.90$MAX	MAX	0.000148
CMYC	10	20	M3840_0.90$MYC	MYC	0.00015
CMYC	16	26	M3840_0.90$MYC	MYC	0.00015
CMYC	22	32	M3840_0.90$MYC	MYC	0.00015
CMYC	5	14	V$TFE3_01	TFE3	0.00015
CMYC	11	20	M4465_0.90$CLOCK	CLOCK	0.000152
CMYC	17	26	M4465_0.90$CLOCK	CLOCK	0.000152
CMYC	23	32	M4465_0.90$CLOCK	CLOCK	0.000152
CMYC	11	20	V$CLOCK_01	CLOCK	0.000152
CMYC	17	26	V$CLOCK_01	CLOCK	0.000152
CMYC	23	32	V$CLOCK_01	CLOCK	0.000152
CMYC	11	20	M0189_0.90$Hes1	HES1	0.000154
CMYC	17	26	M0189_0.90$Hes1	HES1	0.000154
CMYC	23	32	M0189_0.90$Hes1	HES1	0.000154
CMYC	12	20	M0182_0.90$Tcf3	TCF3	0.000154
CMYC	18	26	M0182_0.90$Tcf3	TCF3	0.000154
CMYC	24	32	M0182_0.90$Tcf3	TCF3	0.000154
CMYC	6	15	M0183_0.90$Tcf3	TCF3	0.000154
CMYC	4	16	M3660_0.90$MAX	MAX	0.000155
CMYC	5	21	V$ZSCAN4_03	ZSCAN4	0.000155
CMYC	28	37	M0178_0.90$Arnt2	ARNT2	0.000157
CMYC	30	37	V$CLOCKBMAL_Q6	CLOCKBMAL	0.000158
CMYC	5	14	V$BHLHE41_01	BHLHE41	0.000165
CMYC	12	21	M0218_0.90$Arntl	ARNTL	0.000166
CMYC	18	27	M0218_0.90$Arntl	ARNTL	0.000166
CMYC	24	33	M0218_0.90$Arntl	ARNTL	0.000166
CMYC	29	38	M0198_0.90$Clock	CLOCK	0.000166
CMYC	3	16	V$USF_01	USF	0.000167
CMYC	6	13	M0187_0.90$Id2	ID2	0.000168
CMYC	4	16	M3791_0.90$MAX	MAX	0.000169
CMYC	11	20	V$MLXIPL_01	MLXIPL	0.000169
CMYC	17	26	V$MLXIPL_01	MLXIPL	0.000169
CMYC	23	32	V$MLXIPL_01	MLXIPL	0.000169
CMYC	11	20	V$MYC_01	MYC	0.000171
CMYC	17	26	V$MYC_01	MYC	0.000171
CMYC	23	32	V$MYC_01	MYC	0.000171
CMYC	17	39	V$BHLHB2_04	BHLHB2	0.000172
CMYC	9	22	V$MAX_01	MAX	0.000173
CMYC	15	28	V$MAX_01	MAX	0.000173
CMYC	21	34	V$MAX_01	MAX	0.000173
CMYC	12	22	M3841_0.90$MAX	MAX	0.000176
CMYC	18	28	M3841_0.90$MAX	MAX	0.000176
CMYC	24	34	M3841_0.90$MAX	MAX	0.000176
CMYC	29	38	V$TFEB_01	TFEB	0.000176
CMYC	5	14	V$MYCN_01	MYCN	0.000178
CMYC	8	23	V$E47_02	E47	0.000179
CMYC	14	29	V$E47_02	E47	0.000179
CMYC	20	35	V$E47_02	E47	0.000179
CMYC	11	21	M0195_0.90$Usf1	USF1	0.00018
CMYC	17	27	M0195_0.90$Usf1	USF1	0.00018
CMYC	23	33	M0195_0.90$Usf1	USF1	0.00018
CMYC	3	15	V$USF2_Q6_01	USF2	0.00018
CMYC	4	15	V$CREB3L2_02	CREB3L2	0.000182
CMYC	30	37	V$HIF1AARNT_01	HIF1AARNT	0.000185
CMYC	6	25	V$MYCMAX_03	MYCMAX	0.000185
CMYC	6	14	M0202_0.90$Bhlhe40	BHLHE40	0.000187
CMYC	11	19	M0204_0.90$Bhlhe41	BHLHE41	0.000188
CMYC	17	25	M0204_0.90$Bhlhe41	BHLHE41	0.000188
CMYC	23	31	M0204_0.90$Bhlhe41	BHLHE41	0.000188
CMYC	5	14	V$BHLHE40_02	BHLHE40	0.000189
CMYC	11	20	V$MYCN_01	MYCN	0.000189
CMYC	17	26	V$MYCN_01	MYCN	0.000189
CMYC	23	32	V$MYCN_01	MYCN	0.000189
CMYC	29	38	M5075_0.90$TFEB	TFEB	0.000191
CMYC	28	39	V$CMYC_01	CMYC	0.000192
CMYC	8	15	M0368_0.90$Zscan4	ZSCAN4	0.000192
CMYC	14	21	M0368_0.90$Zscan4	ZSCAN4	0.000192
CMYC	20	27	M0368_0.90$Zscan4	ZSCAN4	0.000192
CMYC	26	33	M0368_0.90$Zscan4	ZSCAN4	0.000192
CMYC	30	37	V$USF_C	USF	0.000193
CMYC	29	38	M0196_0.90$Sohlh2	SOHLH2	0.000194
CMYC	7	12	M1727_0.90$Arnt	ARNT	0.000195
CMYC	13	18	M1727_0.90$Arnt	ARNT	0.000195
CMYC	19	24	M1727_0.90$Arnt	ARNT	0.000195
CMYC	25	30	M1727_0.90$Arnt	ARNT	0.000195
CMYC	31	36	M1727_0.90$Arnt	ARNT	0.000195
CMYC	12	17	V$HIF1A_Q6	HIF1A	0.000195
CMYC	18	23	V$HIF1A_Q6	HIF1A	0.000195
CMYC	24	29	V$HIF1A_Q6	HIF1A	0.000195
CMYC	30	35	V$HIF1A_Q6	HIF1A	0.000195
CMYC	12	31	V$MYCMAX_03	MYCMAX	0.000195
CMYC	7	12	M1821_0.90$Mycn	MYCN	0.000195
CMYC	13	18	M1821_0.90$Mycn	MYCN	0.000195
CMYC	19	24	M1821_0.90$Mycn	MYCN	0.000195
CMYC	25	30	M1821_0.90$Mycn	MYCN	0.000195
CMYC	31	36	M1821_0.90$Mycn	MYCN	0.000195
CMYC	12	18	M1810_0.90$USF1	USF1	0.000195
CMYC	18	24	M1810_0.90$USF1	USF1	0.000195
CMYC	24	30	M1810_0.90$USF1	USF1	0.000195
CMYC	30	36	M1810_0.90$USF1	USF1	0.000195
CMYC	7	12	V$USF2_Q6	USF2	0.000195
CMYC	13	18	V$USF2_Q6	USF2	0.000195
CMYC	19	24	V$USF2_Q6	USF2	0.000195
CMYC	25	30	V$USF2_Q6	USF2	0.000195
CMYC	31	36	V$USF2_Q6	USF2	0.000195
CMYC	25	41	V$MAX_07	MAX	0.000196
CMYC	18	37	V$MYCMAX_03	MYCMAX	0.000196
CMYC	5	14	M0190_0.90$Hes7	HES7	0.000198
CMYC	12	19	M0184_0.90$Tcf3	TCF3	0.000199
CMYC	18	25	M0184_0.90$Tcf3	TCF3	0.000199
CMYC	24	31	M0184_0.90$Tcf3	TCF3	0.000199
CMYC	29	40	V$HIF1_Q5	HIF1	0.0002
CMYC	29	38	M0194_0.90$Npas2	NPAS2	0.000203
CMYC	11	20	M1860_0.90$Myc	MYC	0.000208
CMYC	17	26	M1860_0.90$Myc	MYC	0.000208
CMYC	23	32	M1860_0.90$Myc	MYC	0.000208
CMYC	5	14	V$USF1_02	USF1	0.000208
CMYC	5	14	M4715_0.90$ID4	ID4	0.000211
CMYC	31	42	V$CHREBP_Q6	CHREBP	0.000212
CMYC	9	21	V$ZF5_B	ZF5	0.000212
CMYC	15	27	V$ZF5_B	ZF5	0.000212
CMYC	21	33	V$ZF5_B	ZF5	0.000212
CMYC	11	33	V$BHLHB2_04	BHLHB2	0.000213
CMYC	29	37	M0204_0.90$Bhlhe41	BHLHE41	0.000218
CMYC	4	16	V$E2A_Q6_01	E2A	0.000219
CMYC	7	24	V$TRP53_03	TRP53	0.000219
CMYC	13	30	V$TRP53_03	TRP53	0.000219
CMYC	19	36	V$TRP53_03	TRP53	0.000219
CMYC	11	20	M0190_0.90$Hes7	HES7	0.00022
CMYC	17	26	M0190_0.90$Hes7	HES7	0.00022
CMYC	23	32	M0190_0.90$Hes7	HES7	0.00022
CMYC	5	14	M1822_0.90$Mycn	MYCN	0.000221
CMYC	6	14	M0182_0.90$Tcf3	TCF3	0.000224
CMYC	28	37	V$DEC2_Q2	DEC2	0.000225
CMYC	4	15	V$HES5_01	HES5	0.000226
CMYC	27	40	V$MAX_04	MAX	0.000231
CMYC	6	13	M0184_0.90$Tcf3	TCF3	0.000234
CMYC	11	20	M1822_0.90$Mycn	MYCN	0.000235
CMYC	17	26	M1822_0.90$Mycn	MYCN	0.000235
CMYC	23	32	M1822_0.90$Mycn	MYCN	0.000235
CMYC	8	27	M1824_0.90$TP53	TP53	0.000239
CMYC	14	33	M1824_0.90$TP53	TP53	0.000239
CMYC	5	14	V$MYC_01	MYC	0.00024
CMYC	25	37	M0197_0.90$Hes2	HES2	0.000243
CMYC	11	20	M0223_0.90$Usf2	USF2	0.000243
CMYC	17	26	M0223_0.90$Usf2	USF2	0.000243
CMYC	23	32	M0223_0.90$Usf2	USF2	0.000243
CMYC	12	19	V$SLUG_Q6	SLUG	0.00025
CMYC	18	25	V$SLUG_Q6	SLUG	0.00025
CMYC	24	31	V$SLUG_Q6	SLUG	0.00025
CMYC	8	24	V$TCFE2A_03	TCFE2A	0.00025
CMYC	14	30	V$TCFE2A_03	TCFE2A	0.00025
CMYC	20	36	V$TCFE2A_03	TCFE2A	0.00025
CMYC	5	14	V$MLXIPL_01	MLXIPL	0.000251
CMYC	29	38	M0213_0.90$Hes5	HES5	0.000254
CMYC	10	22	M3791_0.90$MAX	MAX	0.000256
CMYC	16	28	M3791_0.90$MAX	MAX	0.000256
CMYC	22	34	M3791_0.90$MAX	MAX	0.000256
CMYC	5	14	M5074_0.90$TFE3	TFE3	0.000261
CMYC	11	25	V$HIC1_02	HIC1	0.000262
CMYC	17	31	V$HIC1_02	HIC1	0.000262
CMYC	6	15	V$HIF2A_01	HIF2A	0.000262
CMYC	3	16	V$MAX_04	MAX	0.000267
CMYC	28	40	V$DEC_Q1	DEC	0.000268
CMYC	29	38	V$HES1_Q6	HES1	0.000271
CMYC	11	27	V$ZSCAN4_03	ZSCAN4	0.000274
CMYC	17	33	V$ZSCAN4_03	ZSCAN4	0.000274
CMYC	11	20	M0199_0.90$Tcfec	TCFEC	0.000275
CMYC	17	26	M0199_0.90$Tcfec	TCFEC	0.000275
CMYC	23	32	M0199_0.90$Tcfec	TCFEC	0.000275
CMYC	5	14	V$TFEB_02	TFEB	0.000277
CMYC	11	20	V$TCF3_06	TCF3	0.000281
CMYC	17	26	V$TCF3_06	TCF3	0.000281
CMYC	23	32	V$TCF3_06	TCF3	0.000281
CMYC	7	13	V$TWIST_Q6	TWIST	0.000283
CMYC	13	19	V$TWIST_Q6	TWIST	0.000283
CMYC	19	25	V$TWIST_Q6	TWIST	0.000283
CMYC	25	31	V$TWIST_Q6	TWIST	0.000283
CMYC	5	15	M3773_0.90$USF1	USF1	0.000284
CMYC	5	16	V$HIF1_Q5	HIF1	0.000287
CMYC	6	15	V$EBOX_Q6_01	EBOX	0.000298
CMYC	6	14	M0181_0.90$Hey2	HEY2	0.000299
CMYC	11	20	V$ID4_01	ID4	0.000302
CMYC	17	26	V$ID4_01	ID4	0.000302
CMYC	23	32	V$ID4_01	ID4	0.000302
CMYC	10	19	V$NMYC_Q3	NMYC	0.000302
CMYC	16	25	V$NMYC_Q3	NMYC	0.000302
CMYC	22	31	V$NMYC_Q3	NMYC	0.000302
CMYC	1	15	M3676_0.90$USF2	USF2	0.000303
CMYC	30	39	V$HIF2A_01	HIF2A	0.000308
CMYC	11	20	M4715_0.90$ID4	ID4	0.000308
CMYC	17	26	M4715_0.90$ID4	ID4	0.000308
CMYC	23	32	M4715_0.90$ID4	ID4	0.000308
CMYC	2	16	M3675_0.90$USF1	USF1	0.000308
CMYC	30	38	V$ATF1_Q6_01	ATF1	0.000312
CMYC	5	13	M0289_0.90$Xbp1	XBP1	0.000314
CMYC	5	13	M0201_0.90$Figla	FIGLA	0.000315
CMYC	5	14	V$HES1_Q6	HES1	0.000323
CMYC	30	38	M0186_0.90$Srebf1	SREBF1	0.000326
CMYC	29	38	M1860_0.90$Myc	MYC	0.000328
CMYC	5	14	M1860_0.90$Myc	MYC	0.000331
CMYC	6	13	M0203_0.90$Bhlhe40	BHLHE40	0.000333
CMYC	29	38	M0190_0.90$Hes7	HES7	0.000339
CMYC	31	37	V$MITF_Q6	MITF	0.000344
CMYC	29	38	V$TFEC_01	TFEC	0.000344
CMYC	11	19	M0201_0.90$Figla	FIGLA	0.000348
CMYC	17	25	M0201_0.90$Figla	FIGLA	0.000348
CMYC	23	31	M0201_0.90$Figla	FIGLA	0.000348
CMYC	4	14	M3646_0.90$ATF3	ATF3	0.000349
CMYC	5	15	M3745_0.90$USF2	USF2	0.000349
CMYC	30	37	V$TFE_Q6	TFE	0.000353
CMYC	29	39	M3804_0.90$MYC	MYC	0.000357
CMYC	6	15	M0218_0.90$Arntl	ARNTL	0.000361
CMYC	5	18	V$SNA_Q4	SNA	0.000362
CMYC	29	38	V$SREBF1_01	SREBF1	0.000365
CMYC	11	20	M5045_0.90$TCF4	TCF4	0.000373
CMYC	17	26	M5045_0.90$TCF4	TCF4	0.000373
CMYC	23	32	M5045_0.90$TCF4	TCF4	0.000373
CMYC	4	17	V$HIF1_Q3	HIF1	0.000375
CMYC	29	39	M3805_0.90$MYC	MYC	0.000375
CMYC	5	13	V$AP4_Q6_01	AP4	0.000376
CMYC	27	40	V$CREB3_02	CREB3	0.000381
CMYC	4	15	M4650_0.90$HES7	HES7	0.000384
CMYC	4	15	V$HES7_01	HES7	0.000384
CMYC	29	38	V$MYOD_Q6	MYOD	0.000388
CMYC	29	38	V$SREBF2_01	SREBF2	0.000391
CMYC	26	41	V$ARNT_01	ARNT	0.000393
CMYC	6	13	V$TFE_Q6	TFE	0.000393
CMYC	12	19	V$TFE_Q6	TFE	0.000393
CMYC	18	25	V$TFE_Q6	TFE	0.000393
CMYC	24	31	V$TFE_Q6	TFE	0.000393
CMYC	28	39	V$CMYC_02	CMYC	0.000402
CMYC	28	41	V$CREB_Q2_01	CREB	0.000407
CMYC	11	21	V$DEC1_Q2	DEC1	0.000416
CMYC	17	27	V$DEC1_Q2	DEC1	0.000416
CMYC	23	33	V$DEC1_Q2	DEC1	0.000416
CMYC	1	16	M3710_0.90$USF2	USF2	0.000416
CMYC	5	13	M0217_0.90$Tcf4	TCF4	0.000418
CMYC	1	15	M3709_0.90$USF1	USF1	0.000422
CMYC	29	38	V$HEY2_01	HEY2	0.000423
CMYC	11	19	M0217_0.90$Tcf4	TCF4	0.000429
CMYC	17	25	M0217_0.90$Tcf4	TCF4	0.000429
CMYC	23	31	M0217_0.90$Tcf4	TCF4	0.000429
CMYC	10	22	V$MYF5_Q6	MYF5	0.00043
CMYC	16	28	V$MYF5_Q6	MYF5	0.00043
CMYC	22	34	V$MYF5_Q6	MYF5	0.00043
CMYC	10	21	V$CMYC_02	CMYC	0.000432
CMYC	16	27	V$CMYC_02	CMYC	0.000432
CMYC	22	33	V$CMYC_02	CMYC	0.000432
CMYC	35	40	V$FXR_Q5	FXR	0.000432
CMYC	7	13	V$MITF_Q6	MITF	0.000432
CMYC	13	19	V$MITF_Q6	MITF	0.000432
CMYC	19	25	V$MITF_Q6	MITF	0.000432
CMYC	25	31	V$MITF_Q6	MITF	0.000432
CMYC	4	15	M0177_0.90$Arnt	ARNT	0.000434
CMYC	9	22	V$USF_01	USF	0.000437
CMYC	15	28	V$USF_01	USF	0.000437
CMYC	21	34	V$USF_01	USF	0.000437
CMYC	11	19	M0205_0.90$Tcf12	TCF12	0.000446
CMYC	17	25	M0205_0.90$Tcf12	TCF12	0.000446
CMYC	23	31	M0205_0.90$Tcf12	TCF12	0.000446
CMYC	5	13	M0205_0.90$Tcf12	TCF12	0.000458
CMYC	9	20	V$NRF1_02	NRF1	0.000466
CMYC	15	26	V$NRF1_02	NRF1	0.000466
CMYC	21	32	V$NRF1_02	NRF1	0.000466
CMYC	5	15	V$DEC1_Q2	DEC1	0.000473
CMYC	29	37	M0201_0.90$Figla	FIGLA	0.000477
CMYC	7	18	V$CHREBP_Q6	CHREBP	0.000479
CMYC	13	24	V$CHREBP_Q6	CHREBP	0.000479
CMYC	19	30	V$CHREBP_Q6	CHREBP	0.000479
CMYC	25	36	V$CHREBP_Q6	CHREBP	0.000479
CMYC	1	13	M0197_0.90$Hes2	HES2	0.000482
CMYC	30	37	M0822_0.90$ZHX1	ZHX1	0.000484
CMYC	31	39	V$AHRHIF_Q6	AHRHIF	0.000485
CMYC	28	38	M3646_0.90$ATF3	ATF3	0.000485
CMYC	3	16	M3832_0.90$USF1	USF1	0.000485
[truncated: 15,588 more rows]
